# Supplementary material for: Surprising isomer preference on IrIII, favoring facile H–C(sp3) bond cleavage
Source: Royal Society of Chemistry journal article supplement (doi:10.1039/b908954c), 2009-01-01

## SUPPORTING INFORMATION

### Surprising Isomer Preference on Ir<sup>III</sup>, Favoring Facile H-C(sp<sup>3</sup>) Bond Cleavage

Nikolai P. Tsvetkov, Matthew F. Laird, Hongjun Fan, Maren Pink, and Kenneth G. Caulton\*

*Department of Chemistry, Indiana University, Bloomington, IN*

#### Experimental

**General Considerations.** All manipulations were performed using standard Schlenk techniques or in an argon filled glovebox unless otherwise noted. CH<sub>2</sub>Cl<sub>2</sub>, Pentane and THF were purified using an Innovative Technologies solvent purification system Pure Solv 400-6-MD. Deuterated THF and benzene were also dried under Ph<sub>2</sub>CO/Na, vacuum transferred and stored in the glovebox under argon. CD<sub>2</sub>Cl<sub>2</sub> was dried with P<sub>2</sub>O<sub>5</sub>. NMR chemical shifts are reported in ppm relative to protio impurities in the deuterio solvents. Coupling constants are given in Hz. <sup>31</sup>P NMR spectra are referenced to external standards of H<sub>3</sub>PO<sub>4</sub>. All NMR spectra were recorded at 25°C with a Varian Unity INOVA instrument (400 MHz <sup>1</sup>H; 162 MHz <sup>31</sup>P). “PNP” is N(SiMe<sub>2</sub>CH<sub>2</sub>P<sup>t</sup>Bu<sub>2</sub>)<sub>2</sub>. Mass spectra were recorded with a MAT-95XP by Thermo Electron Corp. (Waltham, MA).

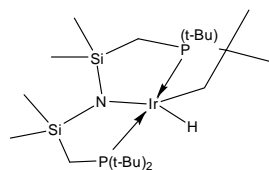

**Synthesis of (PNP\*)IrH.** 200 mg of [(COE)<sub>2</sub>IrCl]<sub>2</sub> (0.223 mmol) was added with vigorous stirring to a solution of 266 mg of (PNP)MgCl(dioxane) (0.446 mmol) in 20 mL of THF. After 2 h all volatiles were removed from the red solution. The residue was dissolved in 10 mL of pentane. The precipitate (MgCl<sub>2</sub>) was filtered and the solution was concentrated, then dried in vacuum at room temperature overnight to remove all cyclooctene. Product was collected and used without further purification. Yield: 94%. Samples prepared by this procedure contains less than 5% of (PNP)IrH<sub>2</sub>. It is also possible to use (PNP)Li(crown)<sup>ref</sup> instead of (PNP)MgCl(dioxane); the main advantages are better accessibility and very low solubility of Li complex in pentane. <sup>1</sup>H NMR (C<sub>6</sub>D<sub>12</sub>): -21.37 (d.d., 1 H, *J* = 11.0, 15.6); 0.03, 0.12, 0.21, 0.30 (all s, 3 H each, SiCH<sub>3</sub>); 1.19 (d, 18 H, *J* = 12.4, P Bu<sup>t</sup><sub>2</sub>, accidental degeneracy); 1.31 (d, 9 H, *J* = 13.7, P Bu<sup>t</sup>); 1.70-1.80 (m, 1 H, CH<sub>2</sub>); other protons in two CH<sub>3</sub> and CH<sub>2</sub> were not located due to overlap with other signals. <sup>31</sup>P{<sup>1</sup>H} NMR (C<sub>6</sub>D<sub>12</sub>): 15.3 (d, *J* = 360); 60.1 (d, *J* = 360). MS CI (THF) Exp: 641.2756 [M]<sup>+</sup> Calc. 641.2737 (C<sub>22</sub>H<sub>52</sub>N<sub>1</sub>Ir<sub>1</sub>P<sub>2</sub>Si<sub>2</sub>).

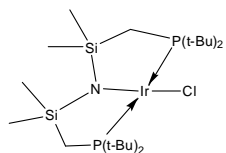

**Synthesis of (PNP)IrCl.** 100 mg of (PNP\*)IrH (0.156 mmol) was dissolved in 20 mL of pentane. 75 mg of  $C_2Cl_6$  (0.320 mmol) was added to the solution at 22°C. The mixture was stirred for one hour and the color changed from red to green-yellow. The reaction mixture was then filtered, concentrated to 10 mL and the product crystallized after 12 h at  $-40^\circ C$ . Green crystals were collected and washed with minimum amount of cold pentane to give 83 mg (79%) after drying in vacuum.  $^1H$  NMR ( $C_6D_{12}$ , 25°C): 1.3 (br.s, 12 H, SiMe), 2.9 (br.s, 36 H,  $Bu^t$ ), 4.5 (br.s, 4 H,  $CH_2$ ). **MS CI** (THF) Exp: 676.2419  $[M]^+$  Calc. 676.2431  $C_{22}H_{52}ClIrNP_2Si_2$ . This reaction also succeeds, but less cleanly, with N-chlorosuccinimide or  $PhICl_2$ , with reductive elimination of H with  $CH_2$ , to give (PNP)IrCl. All spectra ( $^1H$ , absence of  $^{31}P$  and EPR, see below) indicate that (PNP)IrCl is a planar  $d^7$   $Ir^{II}$  monomer.

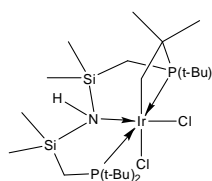

**Synthesis of (PN(H)P\*)Ir(Cl)<sub>2</sub>.** 21 mg of (PNP)IrCl (0.0314 mmol) was dissolved in 0.5 mL of  $CH_2Cl_2$  and 4.2 mg of N-chlorosuccinimide (0.0314 mmol) were added. NMR observation showed full conversion into the product in 12h. The product was isolated by vacuum removal of solvent, the residue was extracted into pentane to remove succinimide, filtered and the pentane soluble were dried in vacuum. Yield: 19 mg(88%)  $^1H$  NMR ( $CD_2Cl_2$ ): 0.44 (s, 3 H,  $SiCH_3$ ), 0.50 (s, 9 H,  $SiCH_3$ , accidental degeneracy), 1.12 (d, 3 H,  $J = 13.9$ ,  $CH_3C$ ), 1.27, 1.38 and 1.47 (three d, 9 H each,  $J = 12.2, 13.7$ , and  $12.4$ , three  $Bu^t$ ), 1.70 (d, 3 H,  $J = 14.3$ ,  $CH_3C$ ), 2.97 (d, 1 H,  $J = 8.7$ , H in  $Ir-CH_2$ ), 3.52 (m, 1 H, H in  $Ir-CH_2$ ), 4.47 (br.s, 1 H, NH); two  $Si-CH_2$  groups were not resolved due to overlapping with other signals.  $^{31}P\{^1H\}$  NMR ( $CD_2Cl_2$ ):  $-47.0$  (d,  $J = 410$ ),  $8.6$  (d,  $J = 410$ ).

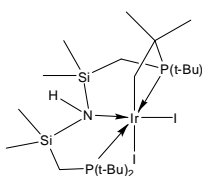

**Synthesis of (PN(H)P\*)Ir(I)<sub>2</sub>.** 20 mg of (PNP\*)IrH (0.0312 mmol) was dissolved in 0.5 mL of benzene and 7.9 mg of  $I_2$  (0.0312 mmol) were added. A precipitate forms and was isolated by filtration after 15 min, washed with pentane and dried to yield 23 mg (83%) of product.  $^1H$  NMR ( $CD_2Cl_2$ , 25°C): 0.48 (s, 3 H,  $SiCH_3$ ), 0.55 (s, 6 H,  $SiCH_3$ , accidental degeneracy), 0.60 (s, 3 H,  $SiCH_3$ ), 1.13 (d, 3

H,  $J = 13.8$ , CH<sub>3</sub>C), 1.35 (br, 9 H, Bu<sup>t</sup>), 1.50 and 1.62 (both d, 9 H each,  $J = 13.6$  and 12.4, two Bu<sup>t</sup>), 1.85 (d, 3 H,  $J = 14.1$ , CH<sub>3</sub>C), 3.16 (d, 1 H,  $J = 7.5$ , H in Ir-CH<sub>2</sub>), 3.93 (m, 1 H, H in Ir-CH<sub>2</sub>), 4.40 (br.s, 1 H, NH); two Si-CH<sub>2</sub> groups were not resolved due to overlapping with other signals. **<sup>31</sup>P{<sup>1</sup>H} NMR** (CD<sub>2</sub>Cl<sub>2</sub>, 25°C): -5.3 (d,  $J = 398$ ), -60.2 (d,  $J = 398$ ). **MS CI** (THF) Exp: 768.1793 [M-I]<sup>+</sup> Calc: 768.1787 C<sub>22</sub>H<sub>52</sub>IIrNP<sub>2</sub>Si<sub>2</sub>. The reaction proceeds equally well in THF, but the product remains soluble and is isolated pure by vacuum removal of all volatiles.

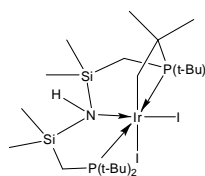

**Synthesis of (PN(H)P\*)Ir(I)<sub>2</sub>.** 20 mg of (PNP\*)IrH (0.0312 mmol) was dissolved in 0.5 mL of THF and 7.9 mg of I<sub>2</sub> (0.0312 mmol) were added. All volatiles were removed in vacuum after 15 min, residue was washed with pentane and dried to yield 23 mg (83%) of product. **<sup>1</sup>H NMR** (CD<sub>2</sub>Cl<sub>2</sub>): 0.48 (s, 3 H, SiCH<sub>3</sub>), 0.55 (s, 6 H, SiCH<sub>3</sub>, accidental degeneracy), 0.60 (s, 3 H, SiCH<sub>3</sub>), 1.13 (d, 3 H,  $J = 13.8$ , CH<sub>3</sub>C), 1.35 (br, 9 H, Bu<sup>t</sup>), 1.50 and 1.62 (both d, 9 H each,  $J = 13.6$  and 12.4, two Bu<sup>t</sup>), 1.85 (d, 3 H,  $J = 14.1$ , CH<sub>3</sub>C), 3.16 (d, 1 H,  $J = 7.5$ , H in Ir-CH<sub>2</sub>), 3.93 (m, 1 H, H in Ir-CH<sub>2</sub>), 4.40 (br.s, 1 H, NH); two Si-CH<sub>2</sub> groups were not resolved due to overlapping with other signals. **<sup>31</sup>P{<sup>1</sup>H} NMR** (CD<sub>2</sub>Cl<sub>2</sub>): -5.3 (d,  $J = 398$ ), -60.2 (d,  $J = 398$ ). **MS CI** (THF) Exp. 768.1793 [M-I]<sup>+</sup> Calc. 768.1787 C<sub>22</sub>H<sub>52</sub>IIrNP<sub>2</sub>Si<sub>2</sub>.

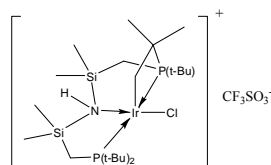

**(PN(H)P\*)IrCl(OTf).** 20 mg of (PNP)IrCl (0.029 mmol) and 9.7 mg of [Cp<sub>2</sub>Fe]OTf (0.029 mmol) was dissolved in 0.5 mL of CH<sub>2</sub>Cl<sub>2</sub>. The green reaction mixture turned to orange in 12h at +40°C. Red crystals formed in 12 h from CH<sub>2</sub>Cl<sub>2</sub> layered with pentane. Yield: 21 mg (86%). **<sup>1</sup>H NMR** (CD<sub>2</sub>Cl<sub>2</sub>, 25°C): 0.41, 0.58, 0.68, 0.72 (all s, 3 H each, SiCH<sub>3</sub>), 1.26 (d, 3 H,  $J = 14.4$ , CH<sub>3</sub>C), 1.29 (d, 9 H,  $J = 13.6$ , Bu<sup>t</sup>), 1.38 and 1.39 (both d, 9 H each,  $J = 13.5$  and 14.5, two Bu<sup>t</sup>), 1.69 (d, 3 H,  $J = 14.1$ , CH<sub>3</sub>C), 3.54 (br.s, 1 H, NH), 3.88 (d, 1 H,  $J = 6.2$ , H in Ir-CH<sub>2</sub>), 4.25 (d.d.d, 1 H,  $J = 3.7, 6.2, 17.1$ , H in Ir-CH<sub>2</sub>); two Si-CH<sub>2</sub> groups were not resolved due to overlapping with other signals. **<sup>31</sup>P{<sup>1</sup>H} NMR** (CD<sub>2</sub>Cl<sub>2</sub>, 25°C): -19.8 (d,  $J = 362$ ), 24.4 (d,  $J = 362$ ). **<sup>19</sup>F{<sup>1</sup>H} NMR** (CD<sub>2</sub>Cl<sub>2</sub>, 25°C): -79.0 (s).

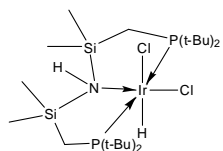

**Synthesis of (PN(H)P)IrH(Cl)<sub>2</sub>.** 16.5 mg (0.025 mmol) of (PNP\*)IrH were dissolved in 0.5 mL of Et<sub>2</sub>O and 0.026 mL (0.0527 mmol) of a 2M solution of HCl in Et<sub>2</sub>O were vacuum transferred at liquid nitrogen temperature. The reaction mixture was then allowed to melt in a Dewar filled with acetone at -40°C. Color of the solution changed from red to yellow after the tube was vigorously shaken. <sup>31</sup>P NMR showed complete conversion into the product. Red crystals (15 mg, 87%) formed in 12 h from CD<sub>2</sub>Cl<sub>2</sub>/pentane. <sup>1</sup>H NMR (CD<sub>2</sub>Cl<sub>2</sub>, 25°C): -25.22 (t, 1 H, J = 12.9), 0.35, 0.43 (both s, 6 H each, SiMe), 1.10, 1.25 (both m, 2 H each, CH<sub>2</sub>), 1.40, 1.48 (both t, 18 H each, J = 6.6, Bu<sup>t</sup>), 3.32 (br.s, 1 H, NH). <sup>31</sup>P{<sup>1</sup>H} NMR (CD<sub>2</sub>Cl<sub>2</sub>, 25°C): 17.6.

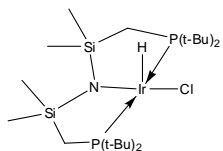

**Synthesis of (PNP)Ir(H)(Cl).** 10 mg (0.014 mmol) of (PN(H)P)Ir(H)(Cl)<sub>2</sub> were dissolved in 2 mL of THF and were reacted with 1.6 mg LiN<sup>i</sup>Pr<sub>2</sub> (0.014 mmol). The color of the solution changed immediately from yellow to purple. After 1h all volatiles were removed in vacuum, the residue was extracted with pentane, filtered and dried in vacuum. Yield: 8mg (84%). <sup>1</sup>H NMR (C<sub>6</sub>D<sub>6</sub>, 25°C): -47.0 (t, 1 H, J = 11.7, Ir-H), 0.25, 0.32 (both s, 6 H each, SiMe), 0.77, 0.89 (m, 2 H each, all CH<sub>2</sub>), 1.27, 1.40 (both t, 18 H each, J = 6.6, Bu<sup>t</sup>). <sup>31</sup>P{<sup>1</sup>H} NMR (C<sub>6</sub>D<sub>6</sub>, 25°C): 42.4.

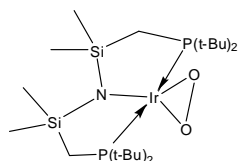

**Synthesis of (PNP)Ir(O<sub>2</sub>).** 18.6 mg of (PNP\*)IrH (0.0312 mmol) was dissolved in 0.5 mL of pentane and was degassed through 3 freeze-pump-thaw cycles using liquid N<sub>2</sub>. 1 atm. of O<sub>2</sub> (~4 equiv.) was added to the evacuated head space of the frozen solution. The reaction vessel was allowed to warm and the red reaction mixture turned to green-yellow in time of mixing. Pentane was removed in vacuum to give 19 mg (97%) of green powder. NMR observation showed full conversion into the product. <sup>1</sup>H NMR (C<sub>6</sub>D<sub>6</sub>, 25°C): 0.24 (s, 12 H, SiCH<sub>3</sub>), 0.66 (t, 4 H, J = 4.4, CH<sub>2</sub>), 1.32 (t, 36 H, J = 6.5, <sup>t</sup>Bu). <sup>31</sup>P{<sup>1</sup>H} NMR (C<sub>6</sub>D<sub>6</sub>, 25°C): 27.9 (s). **MS CI** (THF) Exp: 673.2632 [M]<sup>+</sup> Calc. 673.2641 (C<sub>22</sub>H<sub>52</sub>IrNO<sub>2</sub>P<sub>2</sub>Si<sub>2</sub>).

**Structure determination of (PN(H)P\*)IrI<sub>2</sub>.** An orange crystal (approximate dimensions 0.15 × 0.15 × 0.12 mm<sup>3</sup>) was placed onto the tip of a 0.1 mm diameter glass capillary and mounted on a Bruker APEX II Kappa Duo diffractometer equipped with an APEX II detector at 150(2) K.

### Data collection

The data collection was carried out using Mo K $\alpha$  radiation (graphite monochromator) with a frame time of 15 seconds and a detector distance of 5.0 cm. A collection strategy was calculated and complete data to a resolution of 0.71 Å with a redundancy of 6 were collected (five major sections of frames with 0.50°  $\omega$  and  $\phi$  scans). Data to a resolution of 0.71 Å were considered in the reduction. Final cell constants were calculated from the xyz centroids of 9963 strong reflections from the actual data collection after integration (SAINT).<sup>1</sup> The intensity data were corrected for absorption (SADABS).<sup>2</sup>

### Structure solution and refinement

The space group P2<sub>1</sub>/c was determined based on intensity statistics and systematic absences. The structure was solved using SIR-2004<sup>3</sup> and refined with SHELXL-97.<sup>4</sup> A direct-methods solution was calculated, which provided most non-hydrogen atoms from the E-map. Full-matrix least squares / difference Fourier cycles were performed, which located the remaining non-hydrogen atoms. All non-hydrogen atoms were refined with anisotropic displacement parameters. The hydrogen atoms were placed in ideal positions and refined as riding atoms with relative isotropic displacement parameters. The final full matrix least squares refinement converged to R1 = 0.0363 and wR2 = 0.0805 (F<sup>2</sup>, all data). The remaining electron density is rather large and located near the iodine atoms. The structure was found as proposed with two independent molecules per asymmetric unit.

---

1 SAINT, Bruker Analytical X-Ray Systems, Madison, WI, current version.

2 An empirical correction for absorption anisotropy.

R. Blessing, *Acta Cryst.* A51, 33 - 38 (1995).

3 Sir2004, A Program for Automatic Solution and Refinement of Crystal Structures.

M. C. Burla, R. Caliandro, M. Carnalli, B. Carrozzini, G. L. Cascarano, L. De Caro, C. Giacovazzo, G. Polidori, R. Sagna. Vers. 1.0 (2004).

4 SHELXTL-Plus, Bruker Analytical X-Ray Systems, Madison, WI, current version.

**Structure determination of [(PN(H)P\*)IrCl]OTf.** A red crystal (approximate dimensions  $0.15 \times 0.13 \times 0.10$  mm<sup>3</sup>) was placed onto the tip of a 0.1 mm diameter glass capillary and mounted on a Bruker APEX II Kappa Duo diffractometer equipped with an APEX II detector at 150(2) K.

### Data collection

The data collection was carried out using Mo K $\alpha$  radiation (graphite monochromator) with a frame time of 10 seconds and a detector distance of 5.0 cm. A collection strategy was calculated and complete data to a resolution of 0.77 Å with a redundancy of 4 were collected. Three major sections of frames were collected with  $0.50^\circ$   $\omega$  and  $\phi$  scans. Data to a resolution of 0.82 Å were considered in the reduction. Final cell constants were calculated from the xyz centroids of 9506 strong reflections from the actual data collection after integration (SAINT).<sup>1</sup> The intensity data were corrected for absorption (SADABS).<sup>2</sup>

### Structure solution and refinement

The space group P2<sub>1</sub>/n was determined based on intensity statistics and systematic absences. The structure was solved using SIR-2004<sup>3</sup> and refined with SHELXL-97.<sup>4</sup> A direct-methods solution was calculated, which provided most non-hydrogen atoms from the E-map. Full-matrix least squares / difference Fourier cycles were performed, which located the remaining non-hydrogen atoms. All non-hydrogen atoms were refined with anisotropic displacement parameters. The hydrogen atoms were placed in ideal positions and refined as riding atoms with relative isotropic displacement parameters with the exception of H1n, which is involved in hydrogen bonding and was refined for all parameters. The final full matrix least squares refinement converged to R1 = 0.0316 and wR2 = 0.0815 (F<sup>2</sup>, all data). The remaining electron density is located near Ir.

1 SAINT, Bruker Analytical X-Ray Systems, Madison, WI, current version.

2 An empirical correction for absorption anisotropy.

R. Blessing, *Acta Cryst.* A51, 33 - 38 (1995).

3 Sir2004, A Program for Automatic Solution and Refinement of Crystal Structures.

M. C. Burla, R. Caliendo, M. Carnalli, B. Carrozzini, G. L. Cascarano, L. De Caro, C. Giacovazzo, G. Polidori, R. Sagna. Vers. 1.0 (2004).

4 A short history of *SHELX*.

G. M. Sheldrick, *Acta Cryst.* A64, 112 - 122 (2008).

### Computational Details

All calculations were carried out using Density Functional Theory as implemented in the Jaguar 6.0 suite<sup>1</sup> of ab initio quantum chemistry programs. Geometry optimizations were performed with the PBE<sup>2</sup> functional and the 6-31G\*\* basis set with no symmetry restrictions. Transition metals were represented using the Los Alamos LACVP basis<sup>3, 4</sup>. The energies of the optimized structures were reevaluated by additional single-point calculations on each optimized geometry using Dunning's correlation-consistent triple- $\zeta$  basis set<sup>5</sup> cc-pVTZ(-f) that includes a double set of polarization functions. For all transition metals, we used a modified version of LACVP, designated as LACV3P, in which the exponents were decontracted to match the effective core potential with the triple- $\zeta$  quality basis.

The models used in this study consist of ~80 atoms, which represent the non-truncated substrates that were also used in the experimental work. Although a smaller model may also be able to reproduce the most important features of the studied reaction qualitatively, we chose to employ the large scale model faithfully to construct a realistic model chemistry.

#### References

1. Jaguar, version 6.0, *Schrödinger, L.L.C, New York, NY, 2005.*
2. Perdew, J. P.; Burke, K.; Ernzerhof, M. *Phys. Rev. Lett.* 1996, *77*, 3865; *Phys. Rev. Lett* (Erratum) 1997, *78*, 1386.
3. Hay, P. J.; Wadt, W. R., *J. Chem. Phys.* **1985**, *82*, 270.
4. Wadt, W. R.; Hay, P. J., *J. Chem. Phys.* **1985**, *82*, 284.
5. Dunning, T. H., *J. Chem. Phys.* **1989**, *90*, 1007.

S1. Optimized structure of isomers of (PNP)IrCl<sub>2</sub> (**F**, **G1** and **G2**).

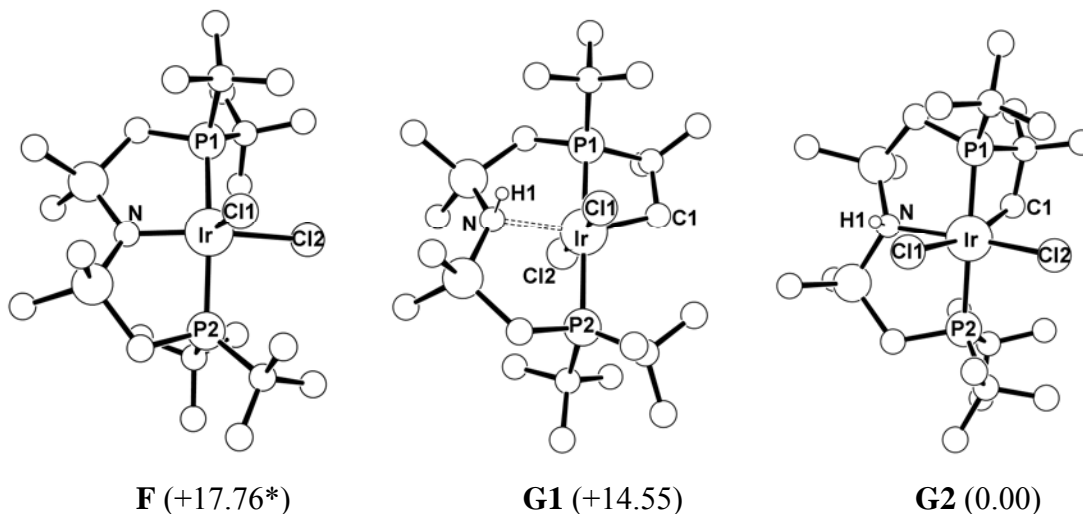

\* Numbers in parenthesis are relative electronic energies in kcal/mol.

Select bond length (in Å) and bond angle (in °).

|            | <b>F</b> |            | <b>G1</b> |           | <b>G2</b> |
|------------|----------|------------|-----------|-----------|-----------|
| Ir-P1      | 2.425    | Ir-P1      | 2.297     | Ir-P1     | 2.323     |
| Ir-P2      | 2.407    | Ir-P2      | 2.458     | Ir-P2     | 2.422     |
| Ir-N       | 2.014    | Ir-N       | 2.367     | Ir-N      | 2.237     |
| Ir-Cl1     | 2.372    | Ir-Cl1     | 2.436     | Ir-Cl1    | 2.573     |
| Ir-Cl2     | 2.484    | Ir-Cl2     | 2.430     | Ir-Cl2    | 2.411     |
| P1-Ir-P2   | 165.0    | Ir-C1      | 2.116     | Ir-C1     | 2.135     |
| N-Ir-Cl2   | 166.4    | N-H1       | 1.034     | N-H1      | 1.055     |
| N-Ir-Cl1   | 109.5    | P1-Ir-P2   | 178.1     | P1-Ir-P2  | 171.8     |
| Cl1-Ir-Cl2 | 83.8     | N-Ir-C1    | 158.6     | N-Ir-C12  | 171.4     |
|            |          | Cl1-Ir-Cl2 | 175.5     | C1-Ir-Cl1 | 163.5     |



S1. Optimized structure of isomers of (PNP)IrHCl (**H** and **I**).

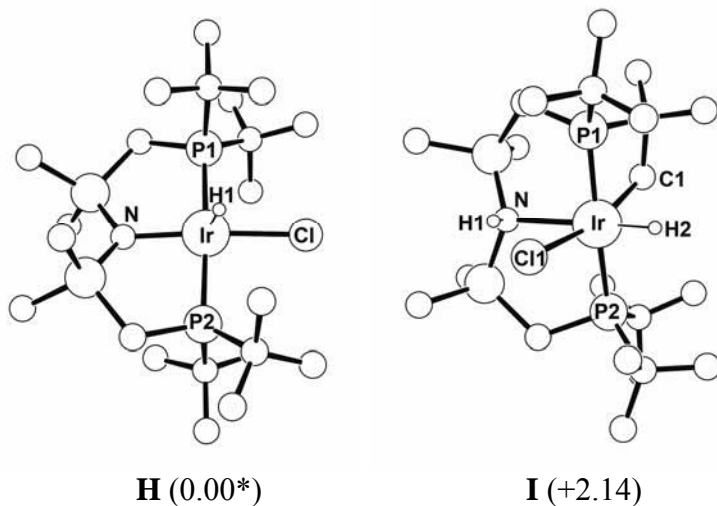

\* Numbers in parenthesis are relative electronic energies in kcal/mol.

Select bond length (in Å) and bond angle (in °):

| <b>H</b> |       | <b>I</b>  |       |
|----------|-------|-----------|-------|
| Ir-P1    | 2.372 | Ir-P1     | 2.301 |
| Ir-P2    | 2.364 | Ir-P2     | 2.365 |
| Ir-N     | 2.073 | Ir-N      | 2.400 |
| Ir-Cl1   | 2.476 | Ir-Cl1    | 2.595 |
| Ir-H1    | 1.545 | Ir-C1     | 2.127 |
| P1-Ir-P2 | 174.9 | Ir-H2     | 1.579 |
| N-Ir-H1  | 107.9 | N-H1      | 1.047 |
| N-Ir-Cl  | 79.1  | P1-Ir-P2  | 170.6 |
| H1-Ir-Cl | 172.9 | C1-Ir-Cl1 | 163.6 |
|          |       | N-Ir-H2   | 171.6 |

## S5. Optimized structures.

| F  |              |              |              | H  |              |              |              |
|----|--------------|--------------|--------------|----|--------------|--------------|--------------|
| Ir | 15.355572485 | 2.407055236  | 18.589144414 | H  | 18.048212545 | -2.194047898 | 18.439204486 |
| P  | 16.454177725 | 0.385855909  | 19.224254000 | H  | 18.215601136 | -1.888836193 | 20.193189698 |
| P  | 13.949163108 | 4.141170552  | 17.939164750 | H  | 19.768084095 | 0.205832356  | 17.399038301 |
| Si | 15.631019323 | 1.755145155  | 21.979647669 | H  | 18.457324444 | 1.415977790  | 17.335112188 |
| Si | 12.893153182 | 3.163514093  | 20.746227904 | H  | 18.180057359 | -0.251731254 | 16.751152785 |
| N  | 14.688772081 | 2.802667618  | 20.806774603 | H  | 14.181649113 | -2.720611779 | 18.528141920 |
| C  | 17.127554510 | 2.779637877  | 22.483412693 | H  | 14.617626774 | -2.077361139 | 20.121803774 |
| H  | 16.821334138 | 3.637023501  | 23.106872621 | H  | 15.867895588 | -2.801663423 | 19.079687126 |
| H  | 17.670842947 | 3.169269805  | 21.607957689 | H  | 14.729433735 | -1.534823484 | 16.402440458 |
| H  | 17.827805682 | 2.174001199  | 23.083301395 | H  | 16.431163809 | -1.786064856 | 16.836424120 |
| C  | 14.628068977 | 1.271615507  | 23.508011402 | H  | 15.862714567 | -0.159007478 | 16.381912649 |
| H  | 14.215327927 | 2.156813811  | 24.020184120 | H  | 13.120743605 | -0.339841921 | 17.874368589 |
| H  | 15.290180539 | 0.761615169  | 24.229387531 | H  | 14.087328042 | 1.093995486  | 17.977323252 |
| H  | 13.797123334 | 0.582219725  | 23.289180071 | H  | 13.597388764 | 0.178522247  | 19.517996096 |
| C  | 16.110220312 | 0.156628704  | 21.049820947 | H  | 14.609402689 | 7.465767108  | 19.620709622 |
| H  | 16.962938810 | -0.332307465 | 21.552506375 | H  | 15.362210222 | 5.883963869  | 19.927074158 |
| H  | 15.265453009 | -0.545611258 | 21.154508667 | H  | 13.587260869 | 6.118085261  | 20.145972543 |
| C  | 15.223934418 | -0.819837498 | 18.393199937 | H  | 15.726431164 | 7.511308950  | 17.516644766 |
| C  | 18.282160216 | -0.058595683 | 18.953937111 | H  | 15.320212176 | 6.455414358  | 16.156773452 |
| C  | 12.490107572 | 4.423422032  | 22.096891373 | H  | 16.376774493 | 5.854420131  | 17.473964561 |
| H  | 13.172808926 | 5.287120674  | 22.119680363 | H  | 14.226434271 | 3.695012477  | 14.039574460 |
| H  | 12.542264326 | 3.934751979  | 23.084623458 | H  | 15.070751246 | 4.930130555  | 14.987241061 |
| H  | 11.463521274 | 4.810498535  | 21.979161768 | H  | 13.285582866 | 4.973224811  | 14.837293480 |
| C  | 11.828250883 | 1.634625661  | 21.061776193 | H  | 16.245193318 | 3.201387548  | 16.171756445 |
| H  | 11.835743660 | 0.889993398  | 20.251896326 | H  | 13.018399799 | 1.827107407  | 15.039511555 |
| H  | 10.784510447 | 1.982654542  | 21.161471544 | H  | 11.916645304 | 3.048465316  | 15.719430977 |
| H  | 12.085187047 | 1.128463249  | 22.005219722 | H  | 12.598854432 | 1.781676033  | 16.763427817 |
| C  | 12.433530421 | 3.831245645  | 18.975401989 | H  | 15.400605999 | 1.643752813  | 15.922020878 |
| H  | 11.845264848 | 3.038090656  | 18.480809771 | Cl | 17.205974229 | 3.817290002  | 18.846447128 |
| H  | 11.775396485 | 4.715076880  | 19.041945715 | H  | 15.158932276 | 3.721242338  | 20.864992296 |
| C  | 14.246708059 | 6.029116249  | 18.037799323 | G1 |              |              |              |
| C  | 13.005331570 | 6.769579141  | 17.496872584 | Ir | 15.196006387 | 2.378568316  | 18.509968144 |
| H  | 13.194597231 | 7.856396189  | 17.550272375 | P  | 16.409090993 | 0.338209083  | 19.149747097 |
| H  | 12.093613840 | 6.572612876  | 18.083601325 | P  | 14.127349941 | 4.322491279  | 17.913592261 |
| H  | 12.800973823 | 6.523058344  | 16.443024150 | Si | 15.338904638 | 1.674248912  | 21.905495792 |
| C  | 14.038758939 | 3.374978715  | 16.162801780 | Si | 12.829443250 | 3.425939434  | 20.629121891 |
| C  | 14.965299742 | -2.171768077 | 19.080940947 | N  | 14.541552305 | 2.812528948  | 20.743007802 |
| C  | 15.591933424 | -1.078355090 | 16.920072679 | C  | 16.319982671 | 2.754397870  | 23.117481673 |
| C  | 13.953239463 | 0.058281312  | 18.487527801 | H  | 15.656926293 | 3.405566941  | 23.711661516 |
| C  | 18.540998391 | -1.558584673 | 19.192215430 | H  | 17.032317787 | 3.395276883  | 22.569981382 |
| C  | 19.106612596 | 0.783538773  | 19.953180834 | H  | 16.901755430 | 2.134863220  | 23.821711941 |
| C  | 18.680864633 | 0.353285446  | 17.521221334 | C  | 14.069310974 | 0.673167250  | 22.889918645 |
| C  | 14.162433208 | 4.314453834  | 14.952264257 | H  | 13.521969506 | 1.335440097  | 23.582342493 |
| C  | 12.825237248 | 2.458372347  | 15.924753073 | H  | 14.586323375 | -0.086491808 | 23.501385631 |
| C  | 15.369497208 | 2.600864501  | 16.470064392 | H  | 13.334154857 | 0.153981303  | 22.258898952 |
| C  | 14.460247050 | 6.375551751  | 19.526106109 | C  | 16.638914119 | 0.595765924  | 20.993134852 |
| C  | 15.494589931 | 6.467400369  | 17.241150910 | H  | 17.572370925 | 1.172238138  | 21.101926131 |
| H  | 20.177844792 | 0.592285205  | 19.766850248 | H  | 16.794232766 | -0.361937356 | 21.523562770 |
| H  | 18.908339512 | 0.514937666  | 21.003251294 | C  | 15.554310215 | -1.399710827 | 19.091515617 |
| H  | 18.928774290 | 1.861884301  | 19.819857701 | C  | 18.227179094 | 0.178852436  | 18.389271895 |
| H  | 19.626210316 | -1.751645879 | 19.122662688 | C  | 12.580119006 | 4.709094325  | 22.014671339 |
|    |              |              |              | H  | 13.398285375 | 5.439705182  | 22.108027742 |

H 12.499050615 4.181909817 22.981235725  
H 11.640829028 5.271222722 21.871444251  
C 11.531446138 2.090064965 20.930866901  
H 11.674544898 1.225421373 20.268138499  
H 10.537392205 2.521525556 20.716536704  
H 11.527270087 1.757039645 21.980838951  
C 12.530014600 4.233229666 18.876073067  
H 11.883218842 3.517482633 18.341437598  
H 11.994992793 5.195557008 18.949464097  
C 14.690188131 6.146530033 18.169887832  
C 13.610167357 7.083222404 17.583193128  
H 13.935448336 8.131077542 17.718866874  
H 12.633570207 6.978565974 18.083154151  
H 13.461822043 6.920204423 16.503763864  
C 14.247114619 3.727760024 16.064635513  
C 16.379615625 -2.582179527 19.653667731  
C 15.154092642 -1.684840057 17.629167619  
C 14.295608999 -1.317375263 19.984338392  
C 18.734668437 -1.254925768 18.138646907  
C 19.263643507 0.857060598 19.309461379  
C 18.191452857 0.911090933 17.032404703  
C 14.843380313 4.706458353 15.039280412  
C 12.883101396 3.264173583 15.527363574  
C 15.271117741 2.579375107 16.404507913  
C 14.813931170 6.398260525 19.685466452  
C 16.050466689 6.473223832 17.514533547  
H 20.238373014 0.861004039 18.787338922  
H 19.404395860 0.299580036 20.251104697  
H 19.000967187 1.899829218 19.536939600  
H 19.727432883 -1.177373782 17.657461527  
H 18.093014295 -1.830268744 17.454089332  
H 18.871261227 -1.826135953 19.068678450  
H 19.181650980 0.820672799 16.548036023  
H 17.961787317 1.977490777 17.162406192  
H 17.440827364 0.477003608 16.350932652  
H 15.679220536 -3.405300474 19.885207823  
H 16.900366349 -2.333856983 20.594769803  
H 17.116209890 -2.978155543 18.945215097  
H 14.627454066 -2.655518067 17.576515017  
H 16.032069642 -1.751361846 16.965111491  
H 14.479749118 -0.905510678 17.243461042  
H 13.667789292 -2.205760090 19.785414050  
H 13.685840488 -0.426826644 19.779882976  
H 14.570476944 -1.348240417 21.050773423  
H 15.091714762 7.455415212 19.851710061  
H 15.607008246 5.773625589 20.128765846  
H 13.865226269 6.226605411 20.214696546  
H 16.413028405 7.429887316 17.933329173  
H 15.964511171 6.612045054 16.428837607  
H 16.806532165 5.703552369 17.727487752  
H 14.881399500 4.183964616 14.065476019  
H 15.871862788 5.003035857 15.285092020  
H 14.229161763 5.612284051 14.897089273  
H 16.279419263 2.874759475 16.069236629  
H 13.037444166 2.756092927 14.557813973  
H 12.218221322 4.128033593 15.348300430

H 12.384013077 2.553223785 16.198308445  
H 14.981572329 1.632956206 15.916233798  
Cl 17.190753784 3.620742606 19.152137878  
H 15.152986416 3.646177912 20.767648046  
Cl 13.154880875 1.141941861 18.052772684

G2

Ir 15.494673101 2.600220362 18.708528371  
P 16.558454771 0.472483104 19.165194897  
P 14.197684870 4.465078044 18.221546194  
Si 15.002368555 1.205010412 21.845516279  
Si 12.804205119 3.242634709 20.736375269  
N 14.472432545 2.532869310 20.697616541  
C 15.661550577 2.051786721 23.404652432  
H 14.874795846 2.604305756 23.944672265  
H 16.461342014 2.761570647 23.135257485  
H 16.083447128 1.305796563 24.100181928  
C 13.557848762 0.090408937 22.362391262  
H 12.879741620 0.632718800 23.043065009  
H 13.957150132 -0.770608933 22.926648676  
H 12.962974826 -0.304175155 21.526834947  
C 16.441579522 0.290833874 21.019502551  
H 17.338619227 0.810540401 21.402876443  
H 16.513068875 -0.761850710 21.344648359  
C 15.675160684 -1.115347798 18.504656276  
C 18.477619454 0.258666545 18.878342998  
C 12.429279432 3.889321450 22.480696076  
H 13.209953272 4.586208808 22.828721633  
H 12.350261750 3.073666132 23.218765954  
H 11.468916212 4.433303203 22.489152518  
C 11.469242311 1.991491052 20.266765058  
H 11.724089632 1.397379508 19.376786001  
H 10.523624743 2.521789885 20.059440540  
H 11.278114086 1.297632992 21.100786427  
C 12.945546358 4.738317274 19.575999342  
H 11.972825424 5.064656663 19.171635203  
H 13.327250269 5.563753672 20.202306725  
C 14.781695155 6.234762666 17.787546936  
C 13.587774731 7.078000276 17.297759634  
H 13.932418391 8.108302994 17.093001210  
H 12.786195610 7.145125006 18.052720251  
H 13.153758179 6.682147547 16.364966600  
C 13.312182693 3.462720448 16.872412776  
C 16.341547038 -2.448180931 18.901402131  
C 15.557682985 -1.057124181 16.967340912  
C 14.257688651 -1.106812011 19.112206290  
C 19.103887406 -0.787469740 19.828400185  
C 19.163256869 1.609269334 19.165116785  
C 18.779871615 -0.135906813 17.417457650  
C 13.798545459 3.790851768 15.449389233  
C 11.778260008 3.531787978 16.895574253  
C 13.910419471 2.095577920 17.369508144  
C 15.380575272 6.853617237 19.072007286  
C 15.893142089 6.193159048 16.720059412  
H 20.251893190 1.477239033 19.018888214

|       |              |              |              |   |              |              |              |
|-------|--------------|--------------|--------------|---|--------------|--------------|--------------|
| H     | 18.999862398 | 1.956010047  | 20.196711337 | C | 12.883453508 | 4.283404246  | 22.206841924 |
| H     | 18.808160918 | 2.399723436  | 18.489765341 | H | 13.647129472 | 5.075835381  | 22.277031491 |
| H     | 20.185893269 | -0.837711865 | 19.608026004 | H | 12.939497978 | 3.685103439  | 23.131172578 |
| H     | 18.698808913 | -1.800945141 | 19.705081935 | H | 11.892675300 | 4.770476778  | 22.194579919 |
| H     | 19.008555146 | -0.503005929 | 20.888205000 | C | 11.709049127 | 1.944829970  | 20.562264649 |
| H     | 19.872055210 | -0.069091542 | 17.259695953 | H | 11.796055417 | 1.346971054  | 19.638640787 |
| H     | 18.294546853 | 0.549700109  | 16.706358607 | H | 10.717712002 | 2.431605465  | 20.561094704 |
| H     | 18.486133333 | -1.172448873 | 17.187042523 | H | 11.739795399 | 1.247870627  | 21.415456633 |
| H     | 15.670591619 | -3.277236110 | 18.608444161 | C | 12.871829094 | 4.353623716  | 19.105732999 |
| H     | 16.509213710 | -2.537989626 | 19.987938752 | H | 11.969627560 | 3.997885002  | 18.580227723 |
| H     | 17.299814342 | -2.610965763 | 18.385859106 | H | 12.699038765 | 5.413835625  | 19.357541033 |
| H     | 14.948506437 | -1.913882959 | 16.625096812 | C | 15.418728196 | 5.672305323  | 18.293452278 |
| H     | 16.532274628 | -1.120291418 | 16.465140306 | C | 14.792305517 | 7.000378436  | 17.827999253 |
| H     | 15.067542236 | -0.134817748 | 16.631477882 | H | 15.434642189 | 7.835497899  | 18.163727515 |
| H     | 13.636638301 | -1.864748533 | 18.600915415 | H | 13.791517687 | 7.167332945  | 18.261510020 |
| H     | 13.766448272 | -0.128274443 | 18.995517570 | H | 14.713355465 | 7.069989074  | 16.732324516 |
| H     | 14.278895447 | -1.369391219 | 20.181373977 | C | 13.510626053 | 4.240534626  | 16.199481052 |
| H     | 15.838215374 | 7.824619646  | 18.809711901 | C | 16.648491036 | -2.573604720 | 19.606579795 |
| H     | 16.159701553 | 6.206948639  | 19.508174649 | C | 15.644172265 | -1.519163113 | 17.547987317 |
| H     | 14.619359896 | 7.059513253  | 19.843464899 | C | 14.477432713 | -1.319034457 | 19.759213023 |
| H     | 16.277661190 | 7.219962815  | 16.578757654 | C | 19.410391932 | -0.517604619 | 20.056183081 |
| H     | 15.530417127 | 5.835236952  | 15.746099686 | C | 19.032709487 | 1.761232203  | 19.067774651 |
| H     | 16.726855378 | 5.545114533  | 17.029439088 | C | 18.856478425 | -0.290106024 | 17.624277417 |
| H     | 13.357719256 | 3.052902221  | 14.754248554 | C | 12.355029538 | 5.263096415  | 16.140340145 |
| H     | 14.892559713 | 3.713973354  | 15.367741165 | C | 12.947655113 | 2.830682283  | 15.911505686 |
| H     | 13.470693946 | 4.791368762  | 15.118484797 | C | 14.548583655 | 4.591753376  | 15.113946948 |
| H     | 14.314186713 | 1.547719881  | 16.503205834 | C | 15.641505554 | 5.749881522  | 19.820464426 |
| H     | 11.374265810 | 2.813731389  | 16.158945325 | C | 16.790895456 | 5.465407235  | 17.617705636 |
| H     | 11.410656845 | 4.534604257  | 16.613162690 | H | 20.126308279 | 1.809446004  | 18.911454128 |
| H     | 11.349423182 | 3.271059998  | 17.874622011 | H | 18.820053204 | 2.238888502  | 20.041212398 |
| H     | 13.125344377 | 1.476854209  | 17.837938719 | H | 18.541043222 | 2.343485010  | 18.272459155 |
| Cl    | 16.865433618 | 2.836577102  | 16.738754898 | H | 20.468333028 | -0.491048822 | 19.737176756 |
| Cl    | 17.057200614 | 3.862655534  | 20.316734609 | H | 19.112582417 | -1.574676893 | 20.117141777 |
| H     | 15.119205775 | 3.308897596  | 21.000537640 | H | 19.372094822 | -0.093601566 | 21.071908138 |
| ===== |              |              |              |   |              |              |              |
| H     |              |              |              |   |              |              |              |
| ===== |              |              |              |   |              |              |              |
| Ir    | 15.453573663 | 2.176003494  | 18.615481390 | H | 19.920744914 | -0.118869239 | 17.377959302 |
| P     | 16.687448783 | 0.324038272  | 19.437096602 | H | 18.243933112 | 0.203599975  | 16.855496098 |
| P     | 14.306915456 | 4.134754447  | 17.953646222 | H | 18.688071298 | -1.378743189 | 17.584496009 |
| Si    | 15.409987556 | 1.700121985  | 21.928517624 | H | 16.040182518 | -3.487997361 | 19.479752911 |
| Si    | 13.110978657 | 3.228641348  | 20.634273114 | H | 16.880492930 | -2.484075577 | 20.681428502 |
| N     | 14.706915407 | 2.492231166  | 20.522816414 | H | 17.591181004 | -2.730839957 | 19.059629315 |
| C     | 16.341667730 | 2.951864668  | 23.018731653 | H | 15.041321054 | -2.426625480 | 17.361414481 |
| H     | 15.665700805 | 3.727455818  | 23.415438931 | H | 16.590274532 | -1.625723627 | 16.997880818 |
| H     | 17.127102864 | 3.464595950  | 22.436996312 | H | 15.112939983 | -0.653703576 | 17.122955542 |
| H     | 16.824855318 | 2.457401457  | 23.879776324 | H | 13.896134608 | -2.210259430 | 19.460992748 |
| C     | 14.175222943 | 0.785317662  | 23.060473528 | H | 13.908164956 | -0.420698637 | 19.469821103 |
| H     | 13.438098160 | 1.466744629  | 23.516598558 | H | 14.562939532 | -1.332864773 | 20.857966098 |
| H     | 14.721227954 | 0.298725055  | 23.888157948 | H | 16.392122624 | 6.534145046  | 20.028402215 |
| H     | 13.615845168 | 0.003986173  | 22.520550374 | H | 16.006697640 | 4.797944726  | 20.237767571 |
| C     | 16.699314642 | 0.446869449  | 21.293437984 | H | 14.721596650 | 6.023078946  | 20.363006833 |
| H     | 17.689461796 | 0.832157350  | 21.588008269 | H | 17.450198220 | 6.314586700  | 17.876577466 |
| H     | 16.596756400 | -0.543576706 | 21.768513962 | H | 16.723944143 | 5.408011277  | 16.521735148 |
| C     | 15.858526299 | -1.365357138 | 19.068377535 | H | 17.269968735 | 4.534580186  | 17.962113959 |
| C     | 18.580221531 | 0.283492319  | 19.028820750 | H | 11.941840770 | 5.260008198  | 15.115316191 |
|       |              |              |              | H | 12.681667358 | 6.290171688  | 16.359996563 |
|       |              |              |              | H | 11.527562686 | 5.014694765  | 16.823414709 |
|       |              |              |              | H | 14.067621034 | 4.492375029  | 14.123401435 |

|       |              |              |              |    |              |              |              |
|-------|--------------|--------------|--------------|----|--------------|--------------|--------------|
| H     | 15.412105531 | 3.910718345  | 15.146699431 | C  | 16.068860813 | 6.088586226  | 16.915800111 |
| H     | 14.903299450 | 5.631702837  | 15.197129530 | H  | 20.128139874 | 1.628641484  | 18.669281705 |
| H     | 12.401454702 | 2.851699798  | 14.950791050 | H  | 18.973659022 | 2.070718993  | 19.961260426 |
| H     | 12.238530692 | 2.496099761  | 16.689175323 | H  | 18.594682844 | 2.480918354  | 18.287932954 |
| H     | 13.760675164 | 2.092246924  | 15.836629337 | H  | 20.213304571 | -0.680170103 | 19.326584015 |
| Cl    | 16.548122304 | 2.017023674  | 16.400463851 | H  | 18.781064360 | -1.714691051 | 19.502000886 |
| H     | 14.468788065 | 1.249749437  | 17.867349541 | H  | 19.093990908 | -0.410560247 | 20.675402866 |
| ===== |              |              |              |    |              |              |              |
| I     |              |              |              |    |              |              |              |
| ===== |              |              |              |    |              |              |              |
| Ir    | 15.502053206 | 2.600412552  | 18.730753013 | H  | 19.640576791 | 0.072842290  | 16.959827734 |
| P     | 16.509991966 | 0.501235370  | 19.145242436 | H  | 17.989537268 | 0.614010895  | 16.572391303 |
| P     | 14.212227574 | 4.441756845  | 18.240712526 | H  | 18.303954872 | -1.092765155 | 17.021650435 |
| Si    | 15.022883696 | 1.199947956  | 21.916491438 | H  | 15.694957899 | -3.281824357 | 18.716884293 |
| Si    | 12.754399682 | 3.226685343  | 20.770045208 | H  | 16.614796824 | -2.474139424 | 20.003580550 |
| N     | 14.401625788 | 2.529948717  | 20.862747964 | H  | 17.281394992 | -2.578014078 | 18.348554313 |
| C     | 15.754258937 | 1.982723706  | 23.478970224 | H  | 14.840184855 | -2.031449948 | 16.746184324 |
| H     | 14.982926654 | 2.505621832  | 24.069426355 | H  | 16.340339543 | -1.128926177 | 16.446949308 |
| H     | 16.531734196 | 2.714220625  | 23.202191749 | H  | 14.814157486 | -0.252725857 | 16.698648961 |
| H     | 16.215205003 | 1.218859002  | 24.128953100 | H  | 13.621365466 | -1.926637790 | 18.782387264 |
| C     | 13.618196652 | 0.046942765  | 22.466653958 | H  | 13.723855498 | -0.176349047 | 19.123267046 |
| H     | 12.981586668 | 0.570443028  | 23.201011294 | H  | 14.338366817 | -1.368023987 | 20.308639676 |
| H     | 14.035440126 | -0.839281690 | 22.975751140 | H  | 15.792131092 | 7.813516488  | 18.912609604 |
| H     | 12.973091594 | -0.308483667 | 21.650494707 | H  | 15.991550632 | 6.220800781  | 19.704132142 |
| C     | 16.466019562 | 0.327181659  | 21.008751077 | H  | 14.435558675 | 7.112429740  | 19.812361938 |
| H     | 17.355156849 | 0.889541511  | 21.350597153 | H  | 16.505203942 | 7.094477142  | 16.777724938 |
| H     | 16.597214781 | -0.717327936 | 21.345028462 | H  | 15.824477982 | 5.693262967  | 15.919317689 |
| C     | 15.628760685 | -1.122423066 | 18.547316366 | H  | 16.832192547 | 5.438452148  | 17.373124425 |
| C     | 18.399293624 | 0.332513043  | 18.717295012 | H  | 13.679577309 | 3.025208147  | 14.722457912 |
| C     | 12.235673267 | 3.950230910  | 22.448918034 | H  | 15.157133498 | 3.641417609  | 15.501332586 |
| H     | 12.978944638 | 4.676682947  | 22.819087536 | H  | 13.822513729 | 4.763062157  | 15.075603826 |
| H     | 12.132014298 | 3.160256899  | 23.212393610 | H  | 14.318254083 | 1.491497443  | 16.510045109 |
| H     | 11.265082764 | 4.471263632  | 22.378675015 | H  | 11.543569224 | 2.827334310  | 15.929582146 |
| C     | 11.461125257 | 1.948069436  | 20.255144361 | H  | 11.557879506 | 4.551808498  | 16.377785337 |
| H     | 11.750621031 | 1.379783965  | 19.358251113 | H  | 11.374415897 | 3.293866265  | 17.634629864 |
| H     | 10.505707380 | 2.456875733  | 20.038412403 | H  | 13.139049066 | 1.518745262  | 17.843976689 |
| H     | 11.271114520 | 1.230342732  | 21.069548339 | H  | 16.370476121 | 2.798273072  | 17.427114026 |
| C     | 12.898096160 | 4.688609174  | 19.544481851 | Cl | 17.052516189 | 3.885594059  | 20.366772958 |
| H     | 11.924305094 | 4.957134476  | 19.099469526 | H  | 15.063586252 | 3.312840554  | 21.075589734 |
| H     | 13.214044022 | 5.553203216  | 20.154385087 |    |              |              |              |
| C     | 14.832080850 | 6.200068218  | 17.831266792 |    |              |              |              |
| C     | 13.719416257 | 7.038503378  | 17.174626607 |    |              |              |              |
| H     | 14.086261212 | 8.066207679  | 16.997126499 |    |              |              |              |
| H     | 12.828816517 | 7.115434400  | 17.821761052 |    |              |              |              |
| H     | 13.402538861 | 6.626432881  | 16.202858871 |    |              |              |              |
| C     | 13.416214249 | 3.459569978  | 16.821433449 |    |              |              |              |
| C     | 16.360452108 | -2.424661056 | 18.931793789 |    |              |              |              |
| C     | 15.403767039 | -1.120266741 | 17.020719851 |    |              |              |              |
| C     | 14.249268876 | -1.137981680 | 19.236361442 |    |              |              |              |
| C     | 19.144553395 | -0.683474663 | 19.609217324 |    |              |              |              |
| C     | 19.055040872 | 1.711218586  | 18.924886595 |    |              |              |              |
| C     | 18.576062223 | -0.046625160 | 17.232758919 |    |              |              |              |
| C     | 14.062779776 | 3.756552992  | 15.457703237 |    |              |              |              |
| C     | 11.889765329 | 3.546651122  | 16.694490604 |    |              |              |              |
| C     | 13.955436357 | 2.088520063  | 17.363195432 |    |              |              |              |
| C     | 15.283542476 | 6.862358920  | 19.153057228 |    |              |              |              |

EPR of (PNP)IrCl, 22°C (sim at bottom)

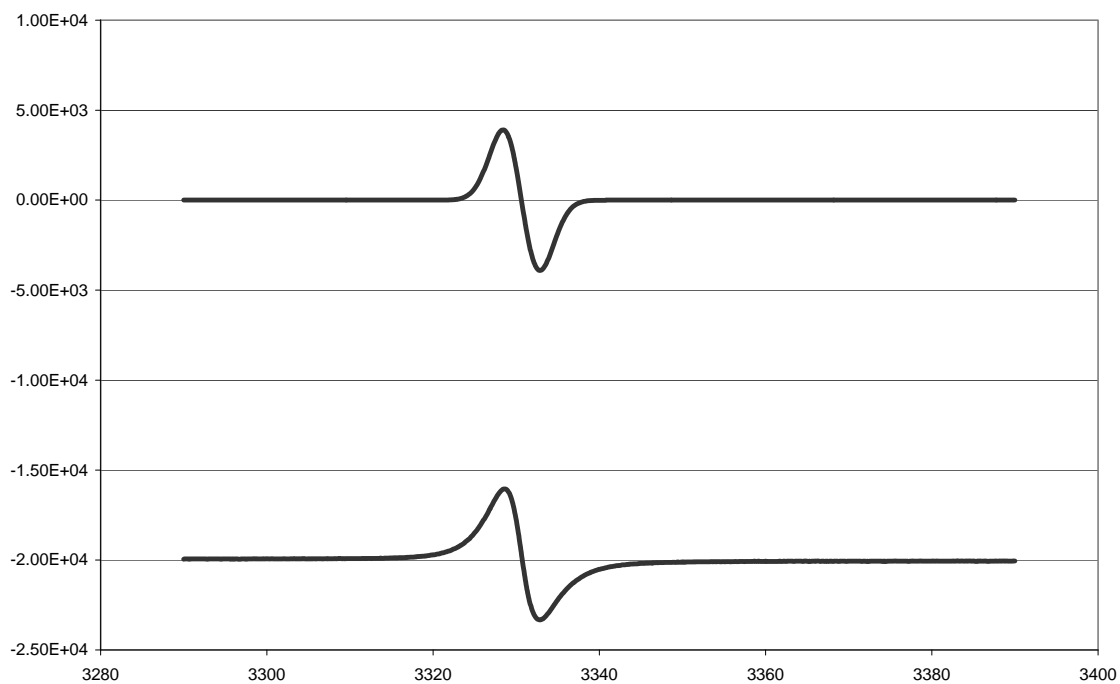

EPR of (PNP)IrCl at -90 °C in CH<sub>2</sub>Cl<sub>2</sub> (sim at bottom)

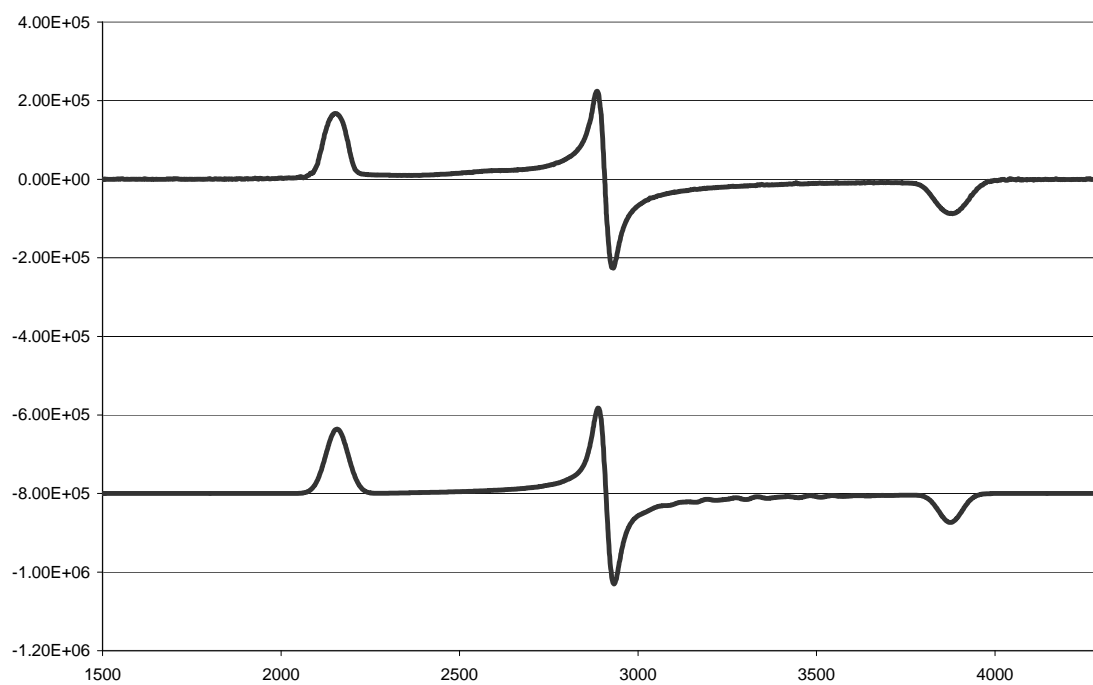

All EPR at 9.3466 GHz: 22° C  $g = 2.005$ ; -90° C  $g = 1.742, 2.32, 3.13$  all in CH<sub>2</sub>Cl<sub>2</sub>.

All spectra shown below were made at 25°C. NMR spectra were recorded with a Varian Unity INOVA instrument (400 MHz  $^1\text{H}$ ; 162 MHz  $^{31}\text{P}$ ). Solvents are either  $\text{C}_6\text{D}_6$  (impurity at 7.15 ppm) or  $\text{CD}_2\text{Cl}_2$  (5.32 ppm).

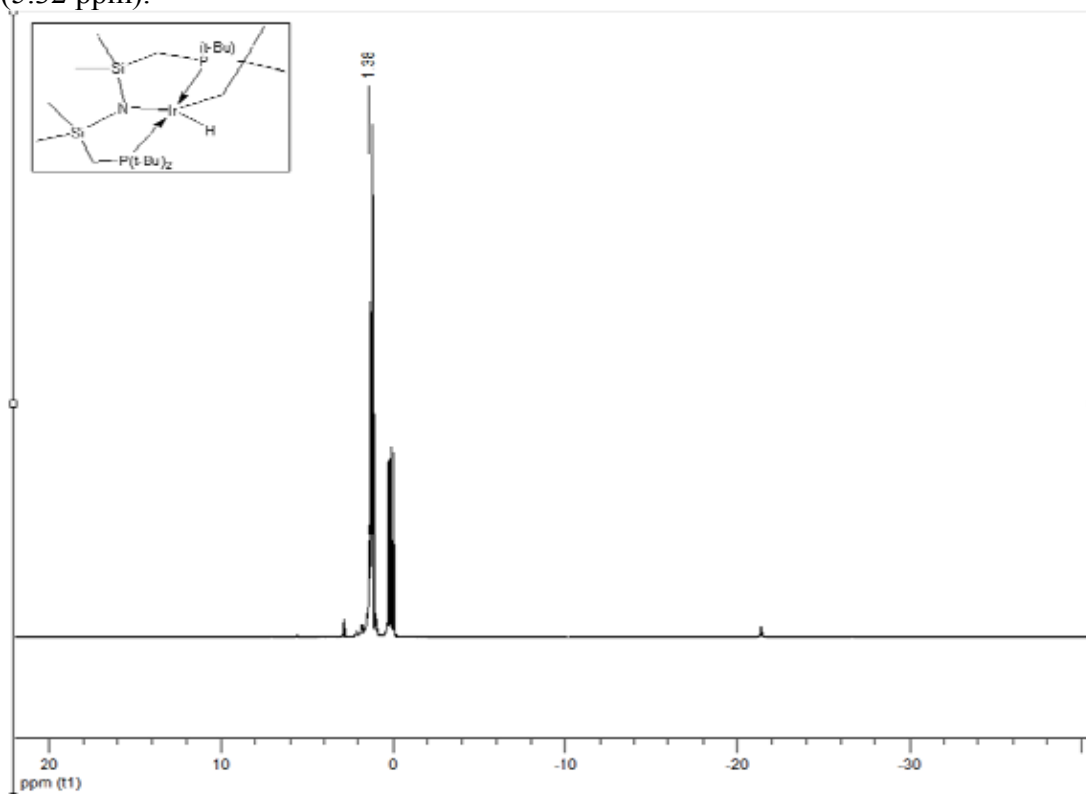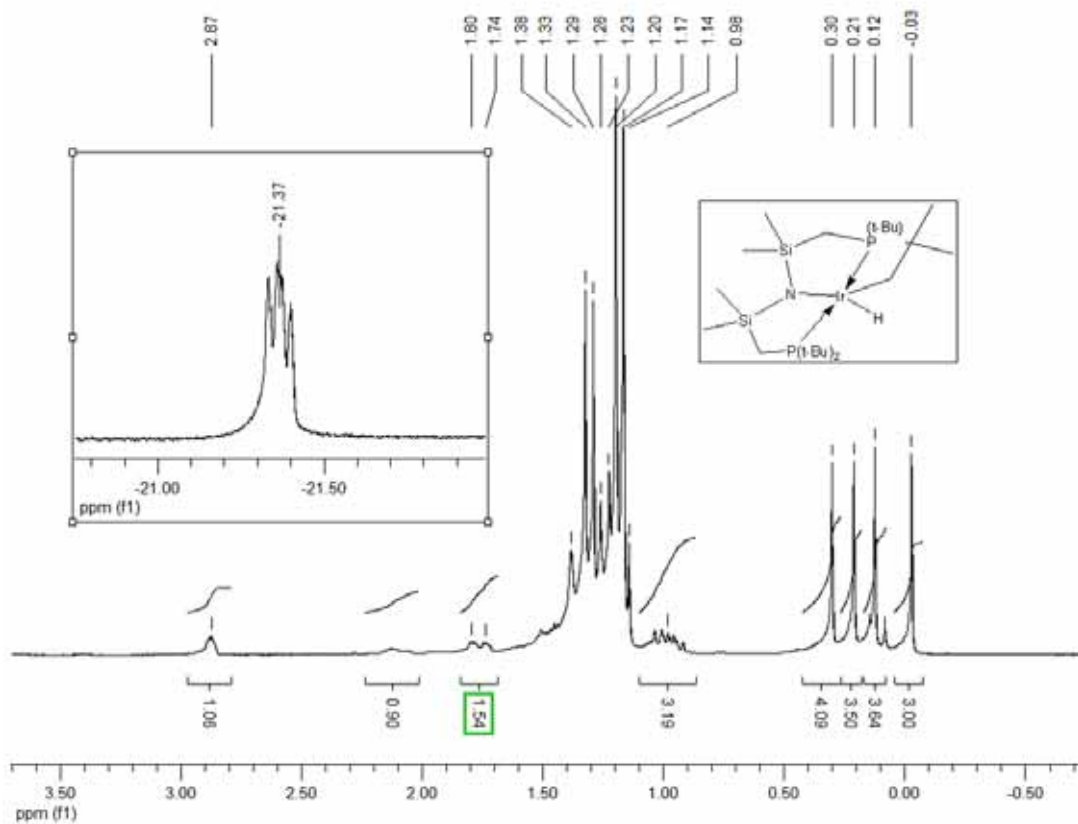

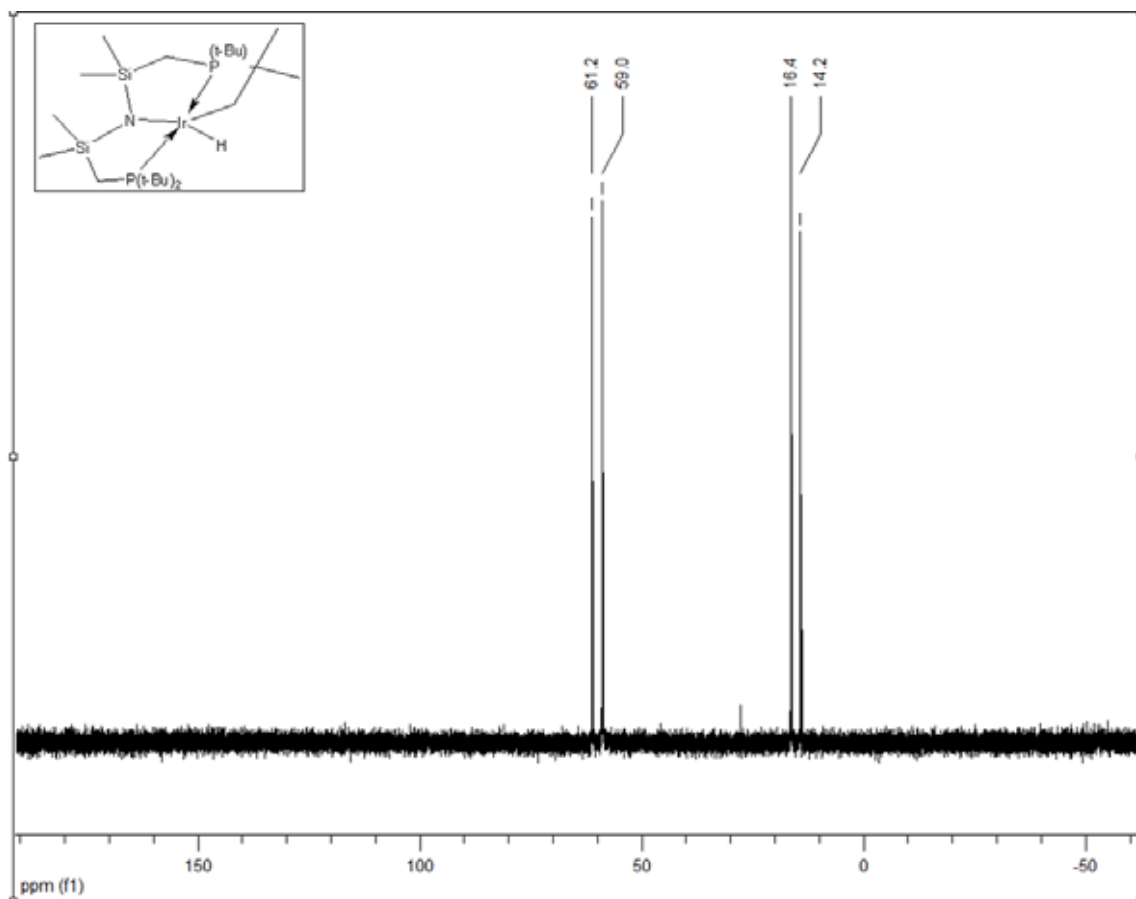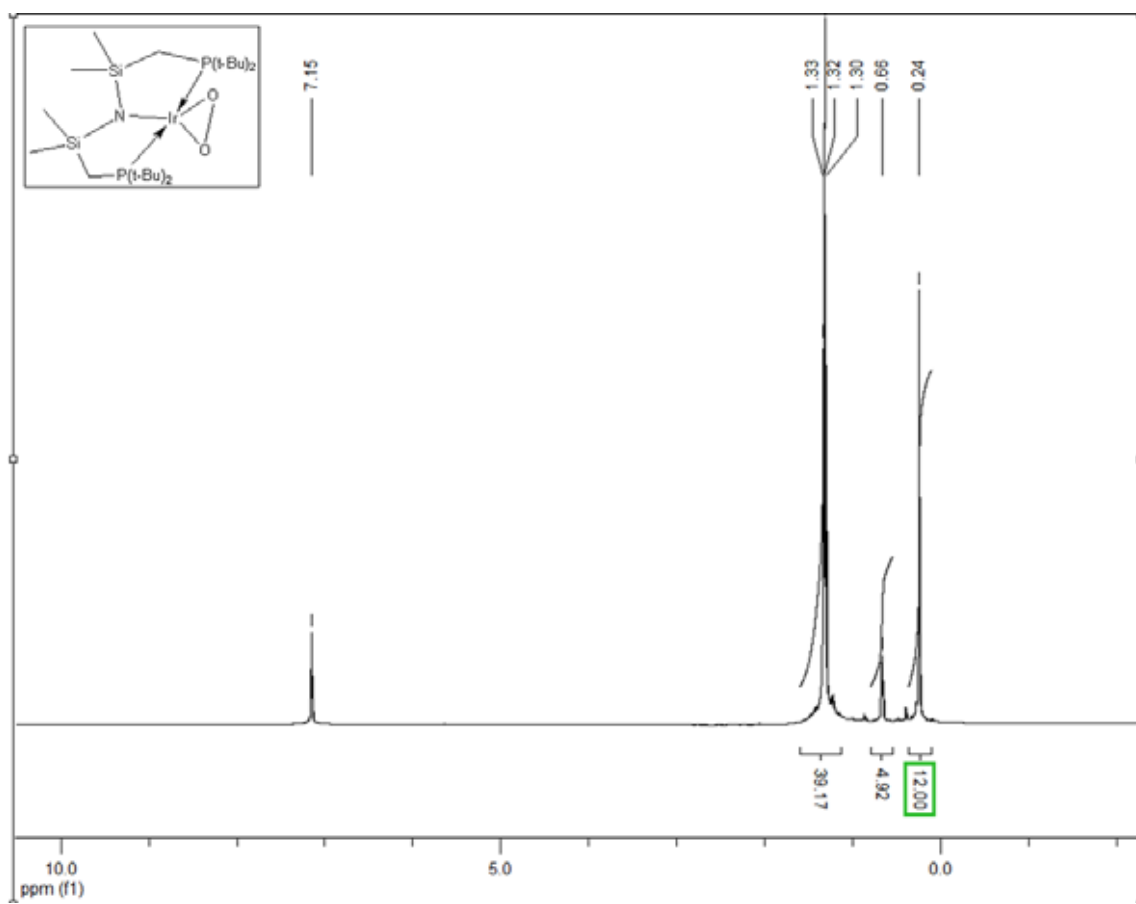



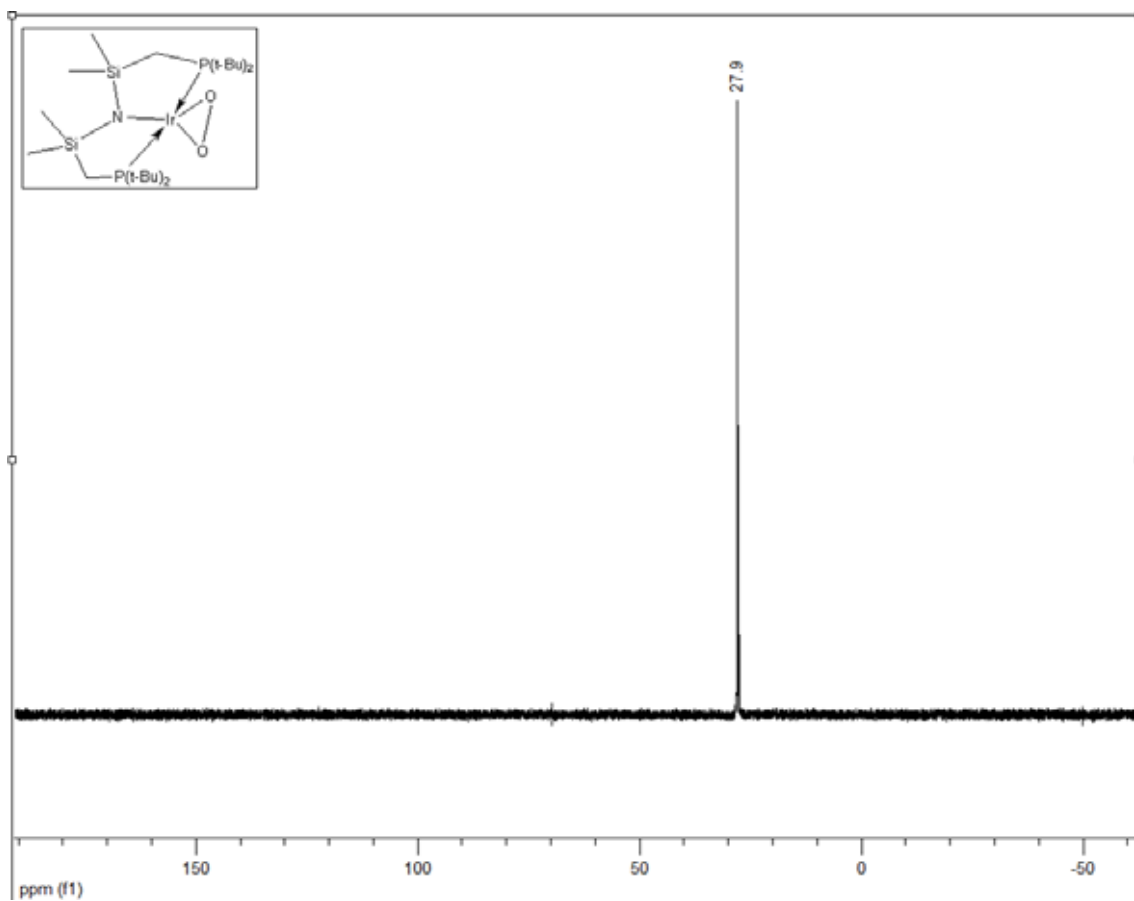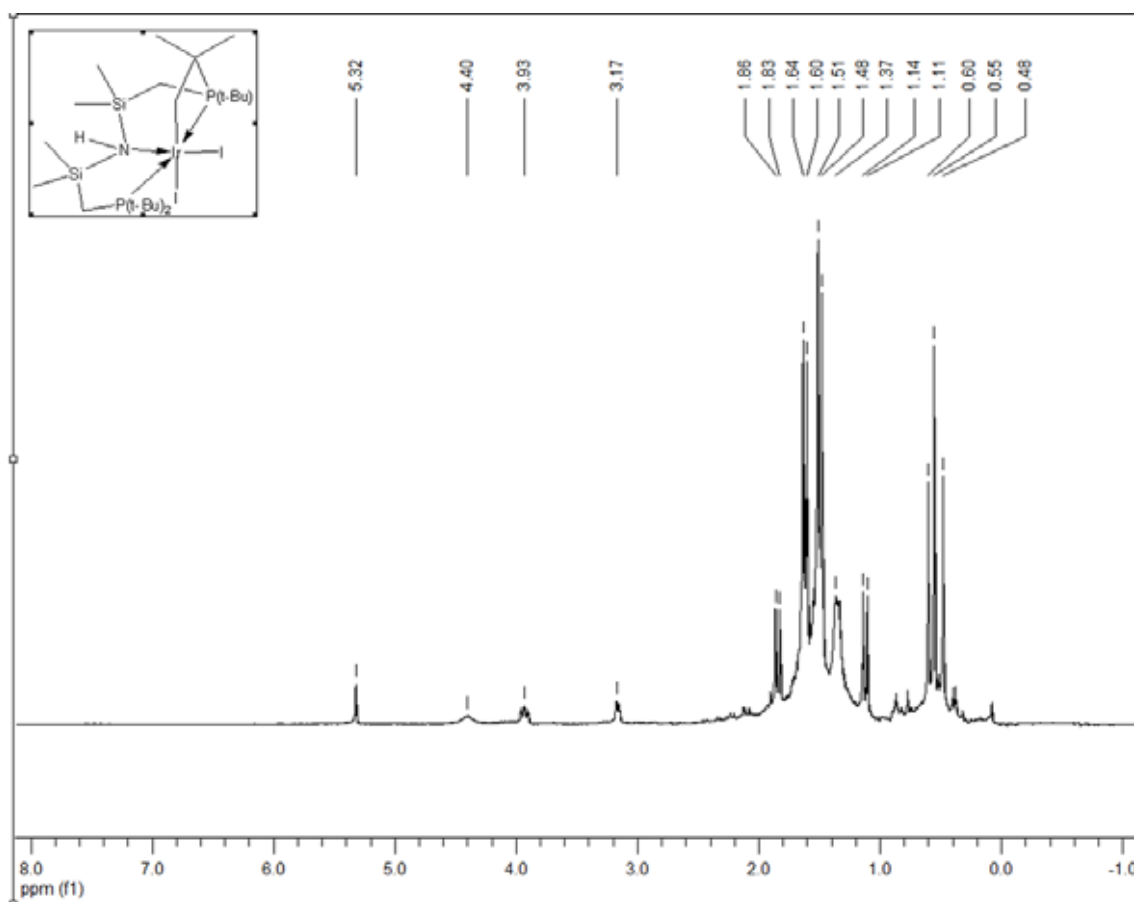

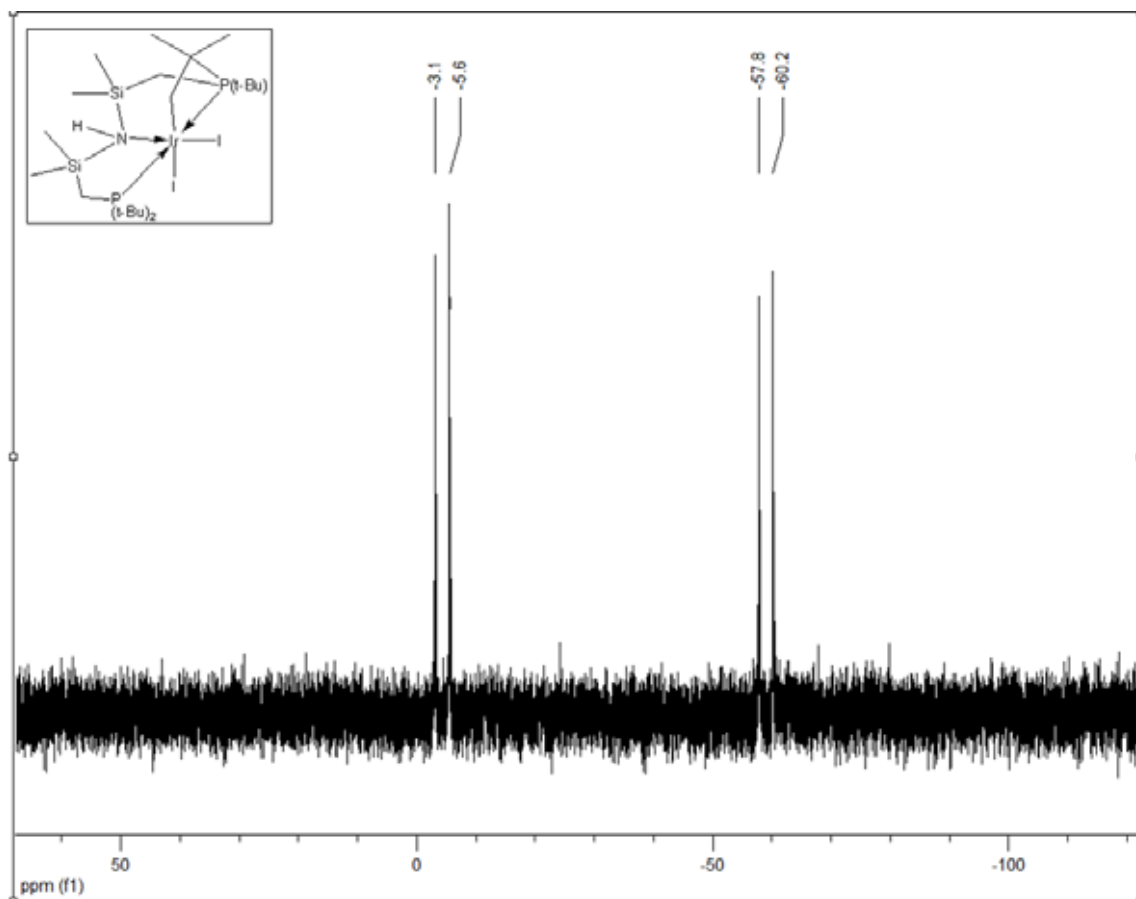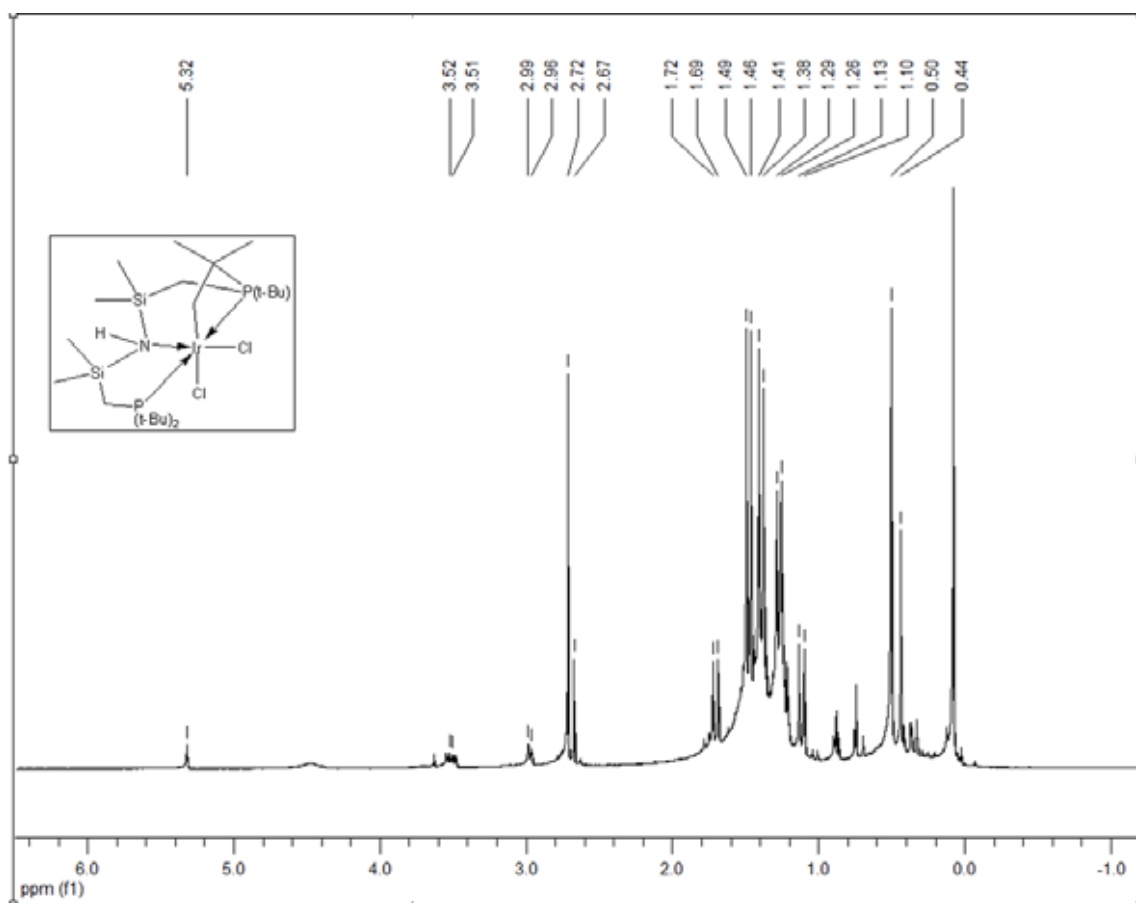

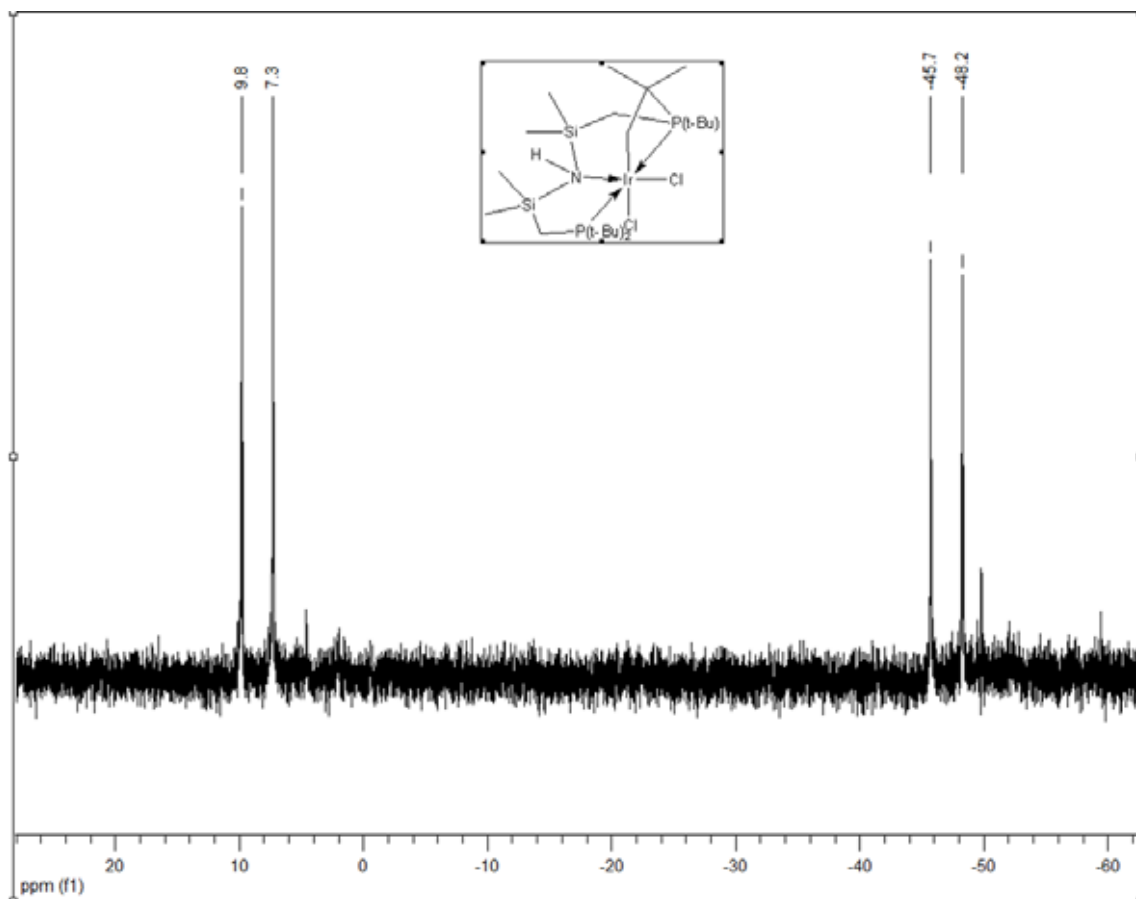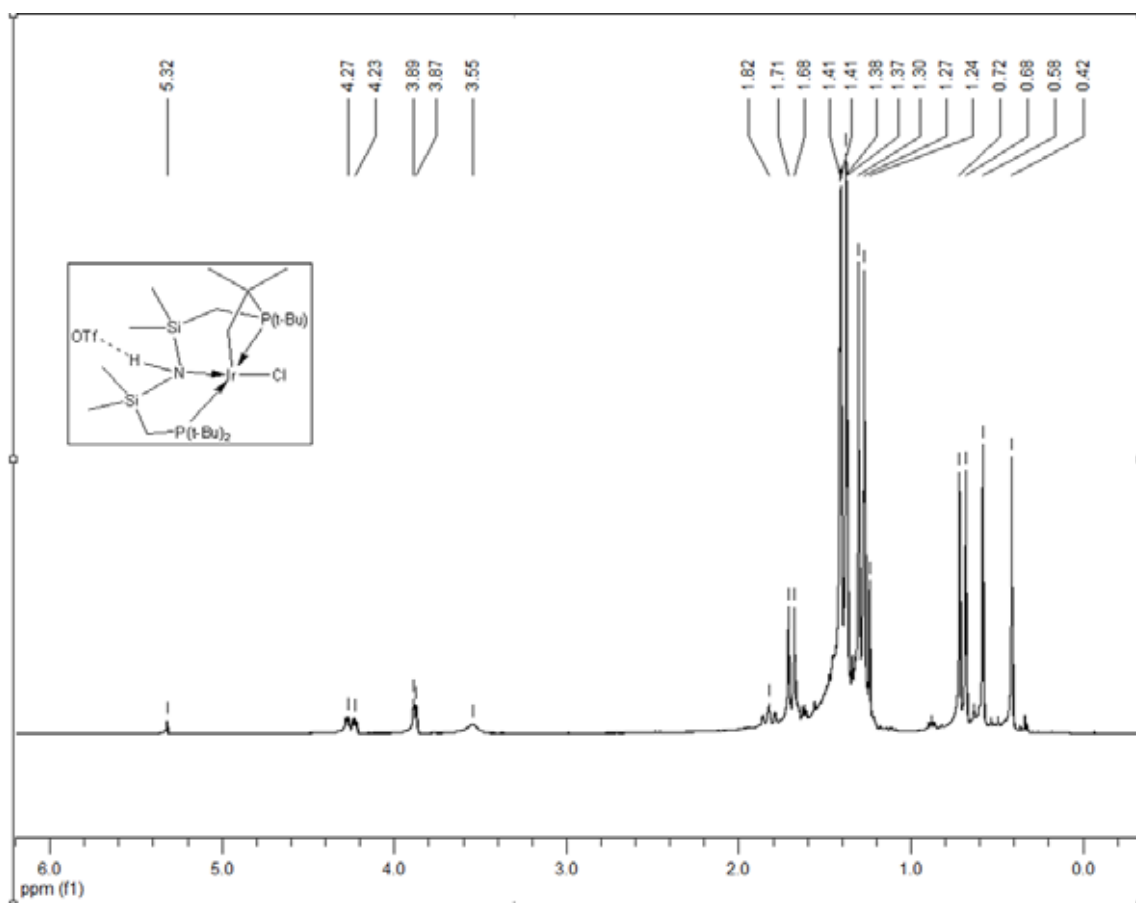

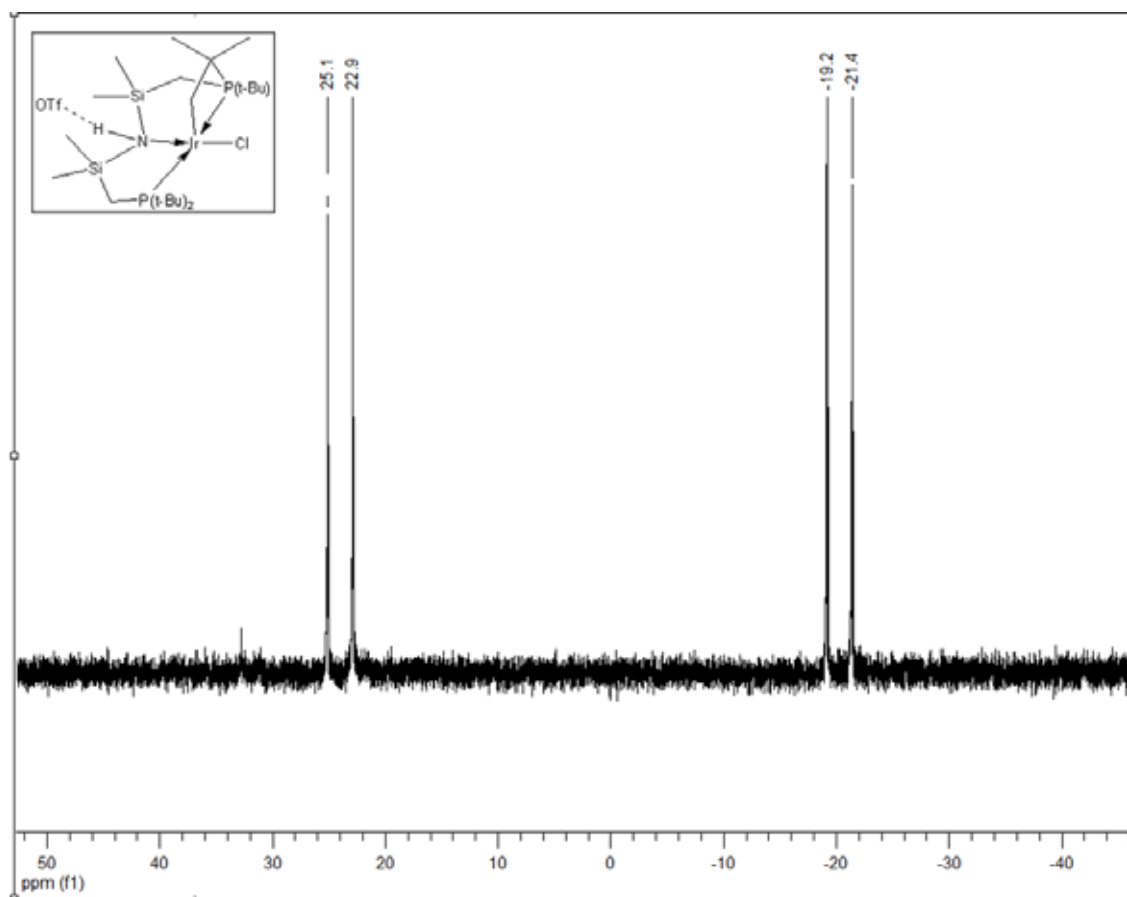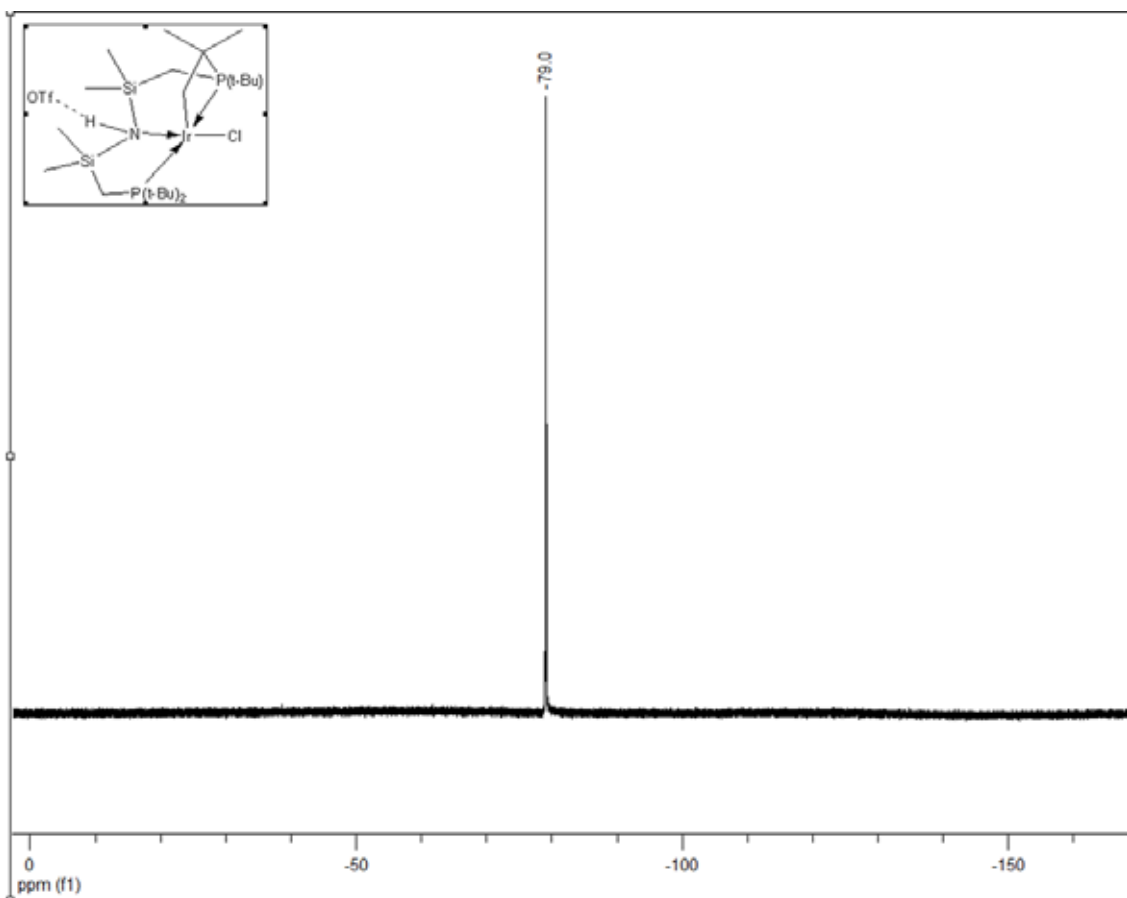

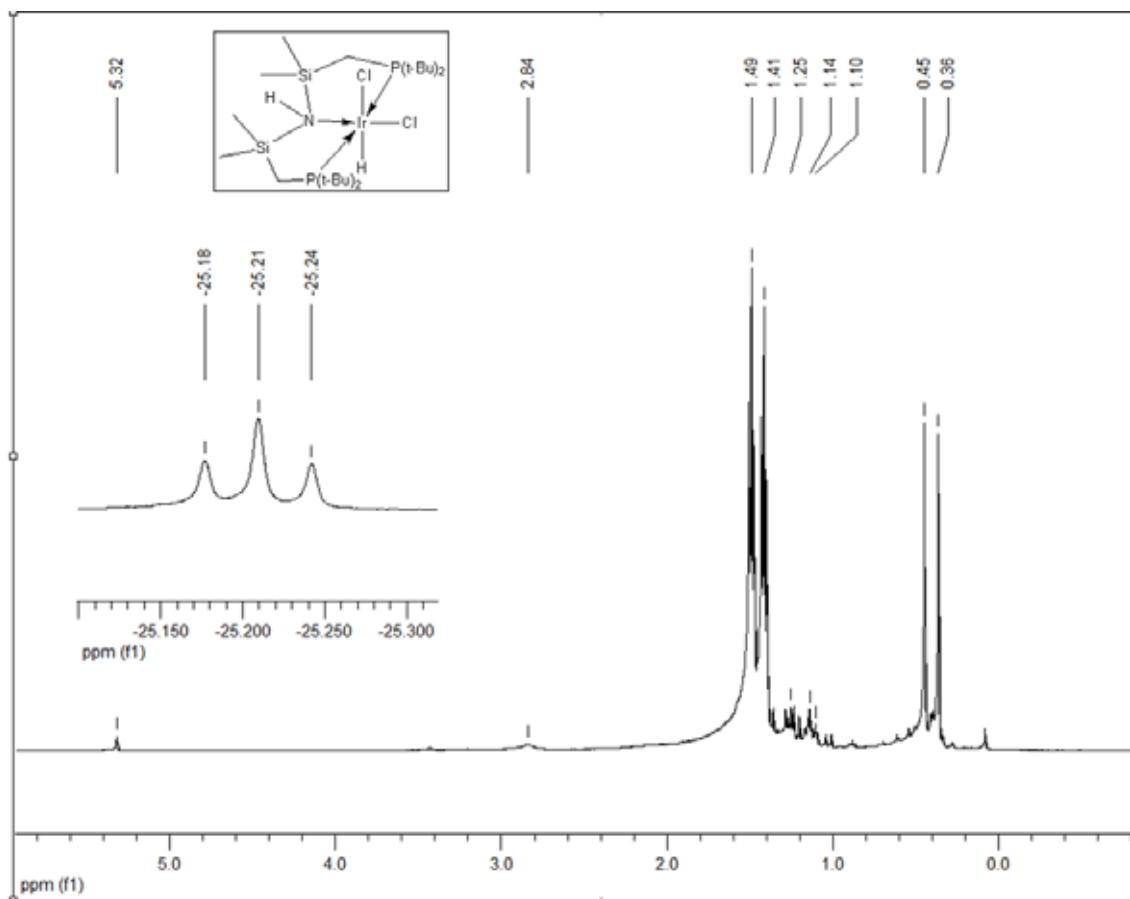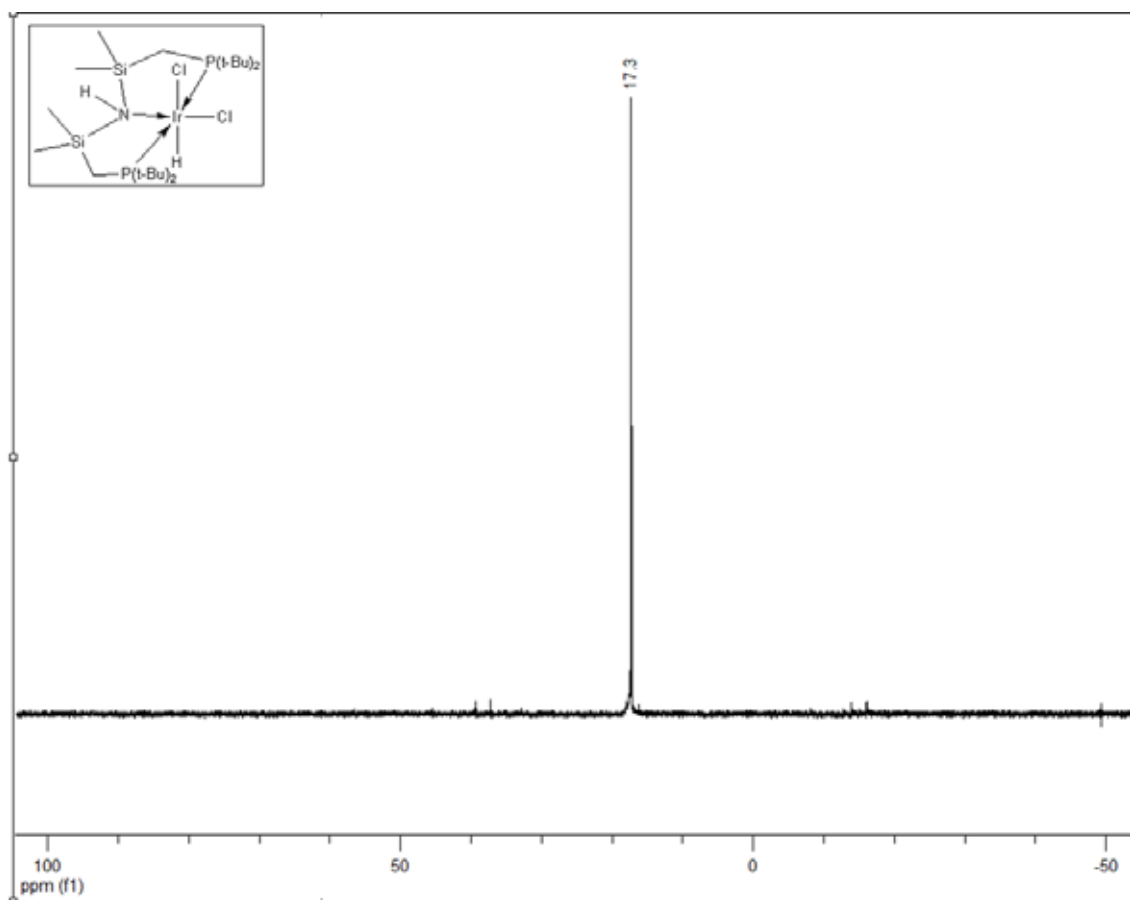

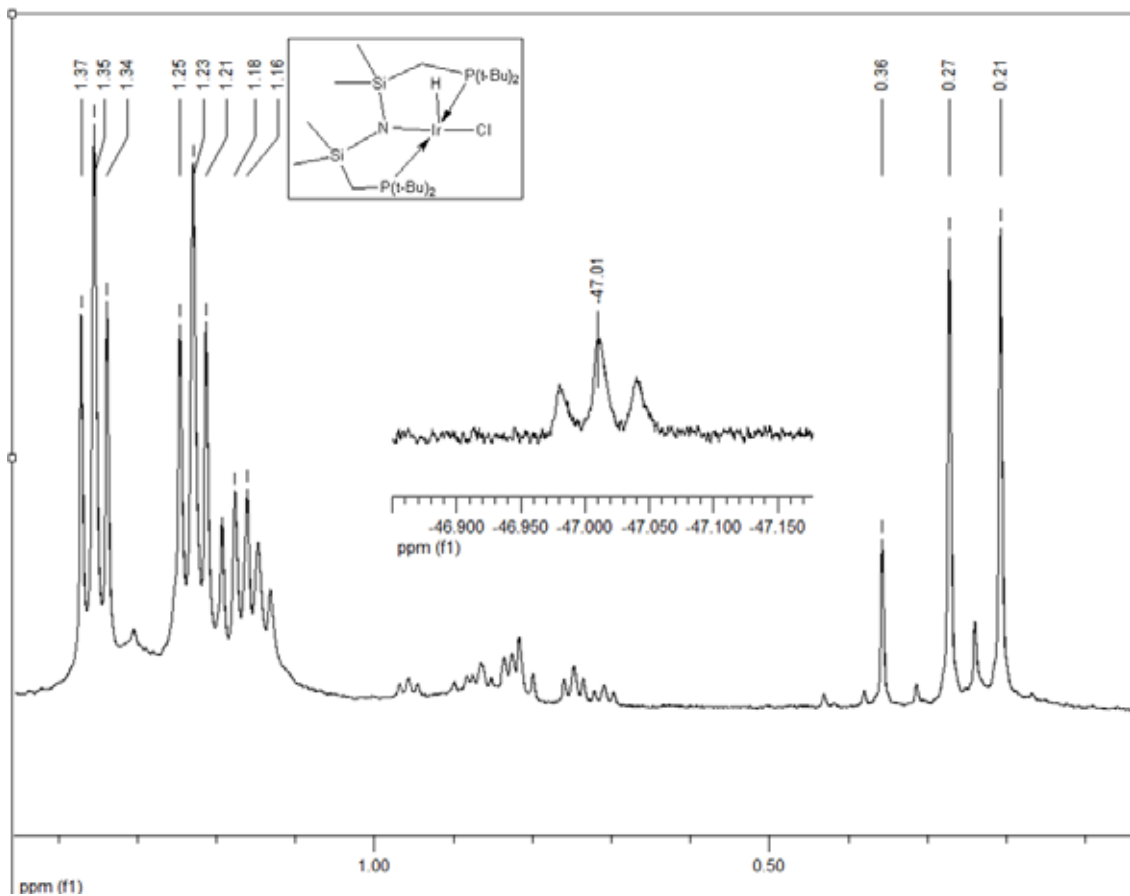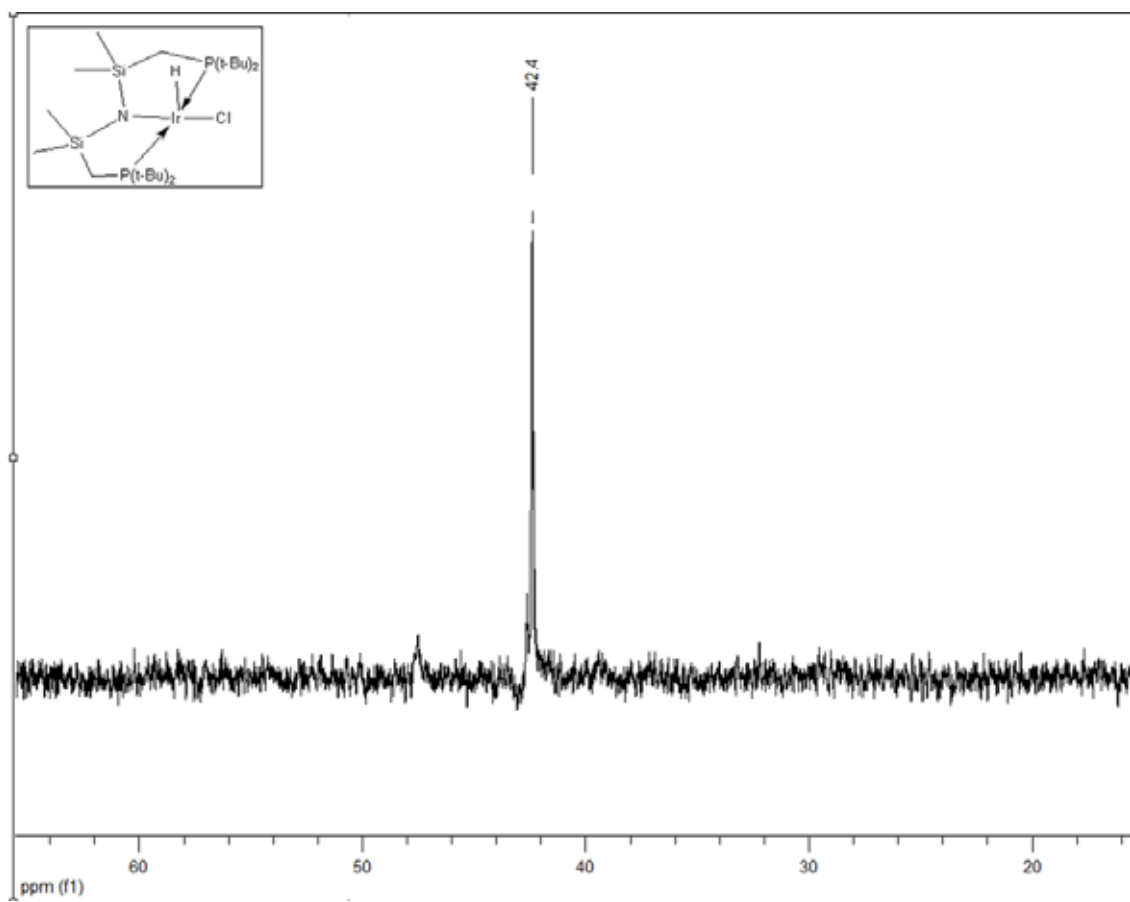

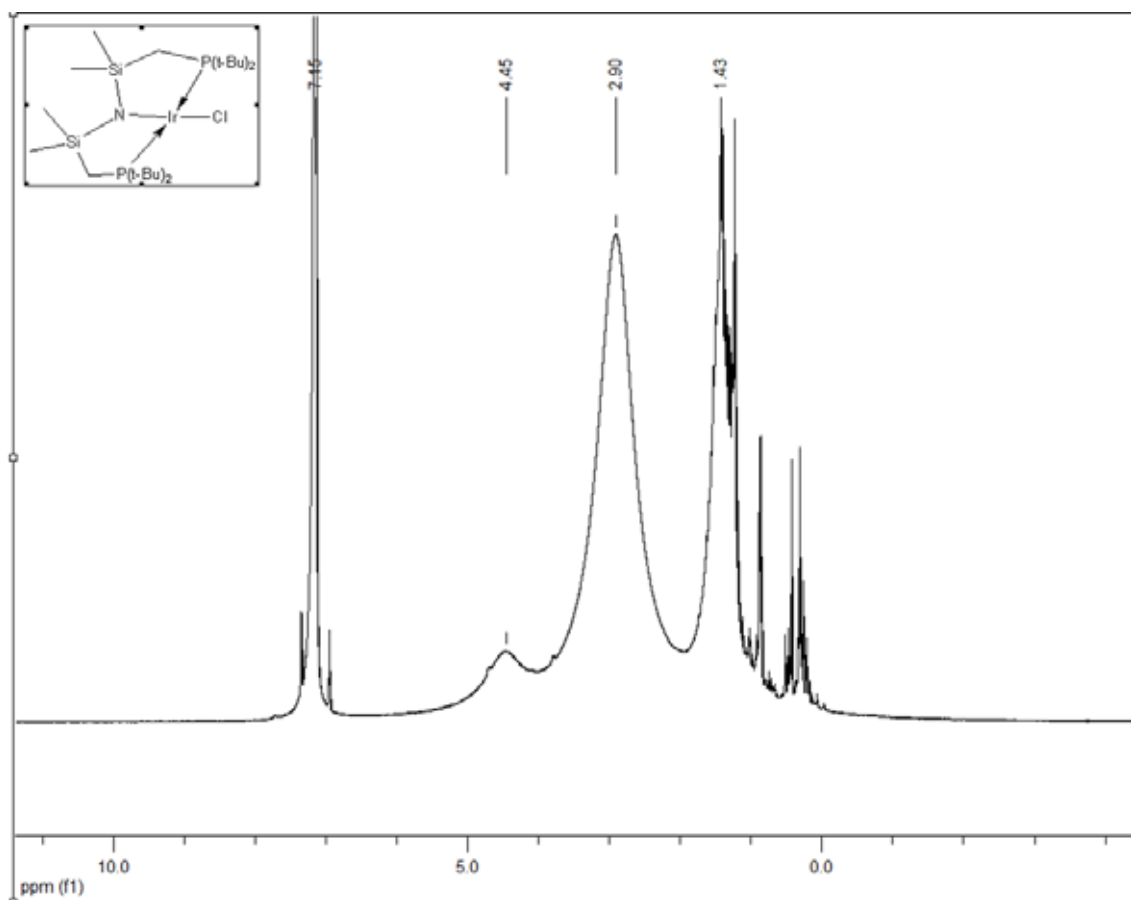

Supplement: b908954c.pdf [file b908954c.pdf]
